# Supplementary material for: Green Process for the Synthesis of 3-Amino-2-methyl-quinazolin-4(3H)-one Synthones and Amides Thereof:DNA Photo-Disruptive and Molecular Docking Studies
Source: MDPI journal article supplement (doi:10.3390/pr10020384), 2022-02-17
Supplement: s1 [file s1]

# Supporting Information

## Green Process for the Synthesis of 3-Amino-2-Methyl-Quinazolin-4(3*H*)-one Synthones and Amides Thereof. DNA Photo-Disruptive and Molecular Docking Studies

Chrysoula Mikra <sup>1,†</sup>, Maria Bairaktari <sup>2,3,†</sup>, Marina-Theodora Petridi <sup>2</sup>, Anastasia Detsi <sup>2,\*</sup> and Konstantina C. Fylaktakidou <sup>1,3,\*</sup>

<sup>1</sup> Laboratory of Organic Chemistry, Chemistry Department, Aristotle University of Thessaloniki, GR 54124, Thessaloniki, Greece

<sup>2</sup> Laboratory of Organic Chemistry, School of Chemical Engineering, National Technical University of Athens, Athens, 15780, Greece

<sup>3</sup> Laboratory of Organic, Bioorganic and Natural Product Chemistry, Molecular Biology and Genetics Department, Democritus University of Thrace, University Campus, Dragana, 68100, Alexandroupolis, Greece

<sup>†</sup> Equal Contribution

\* Correspondence: A.D.: [adetsi@chemeng.ntua.gr](mailto:adetsi@chemeng.ntua.gr); K.C.F.: [kfylakta@chem.auth.gr](mailto:kfylakta@chem.auth.gr)

## Table of contents

|            |                                                                 |         |
|------------|-----------------------------------------------------------------|---------|
| <i>S.1</i> | <i>Copies of NMR spectra of 3-amino-quinazolinones 3a–3k</i>    | S3-S8   |
| <i>S.2</i> | <i>Copies of NMR spectra of 3-acetamido-quinazolinones 5–8</i>  | S9-S12  |
| <i>S.3</i> | <i>Copies of NMR spectra of 3-arylamide-quinazolinones 9-19</i> | S13-S23 |
| <i>S.4</i> | <i>Gel electrophoresis studies</i>                              | S24     |
| <i>S.5</i> | <i>Molecular Docking Images</i>                                 | S25-S27 |

## 1. Copies of NMR spectra of compounds 3a-3k

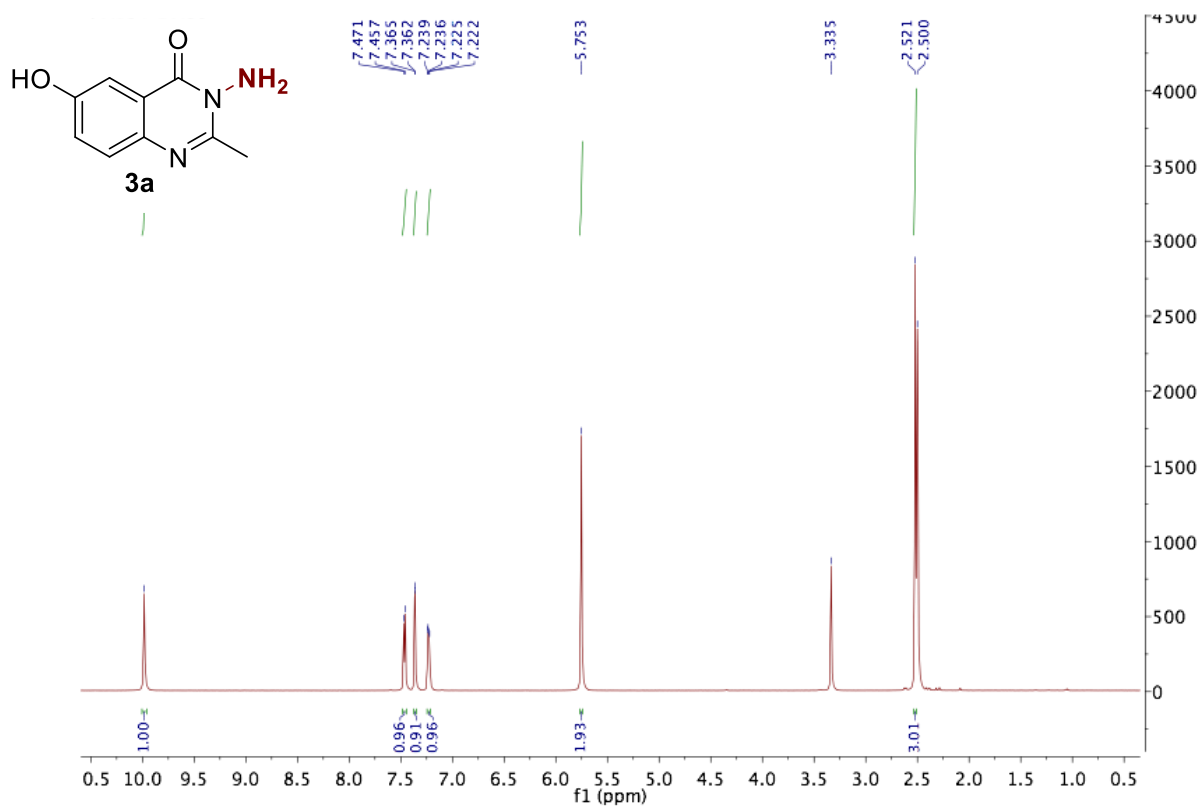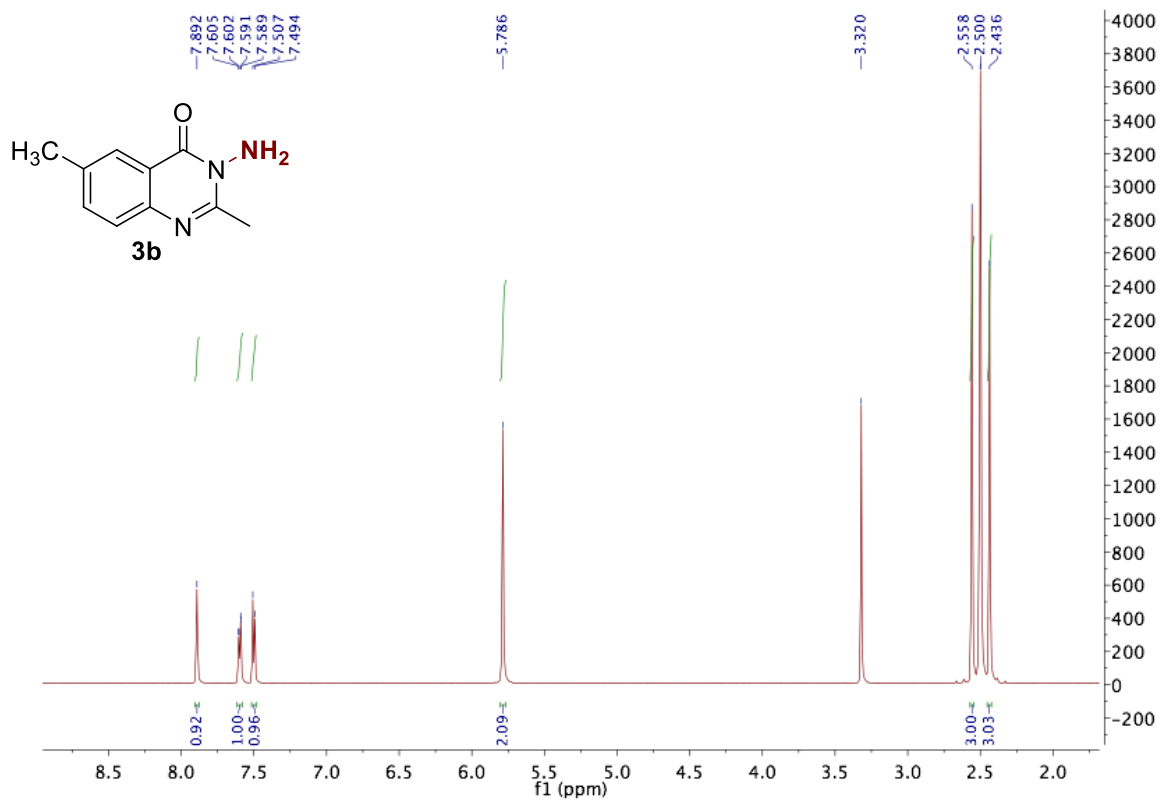

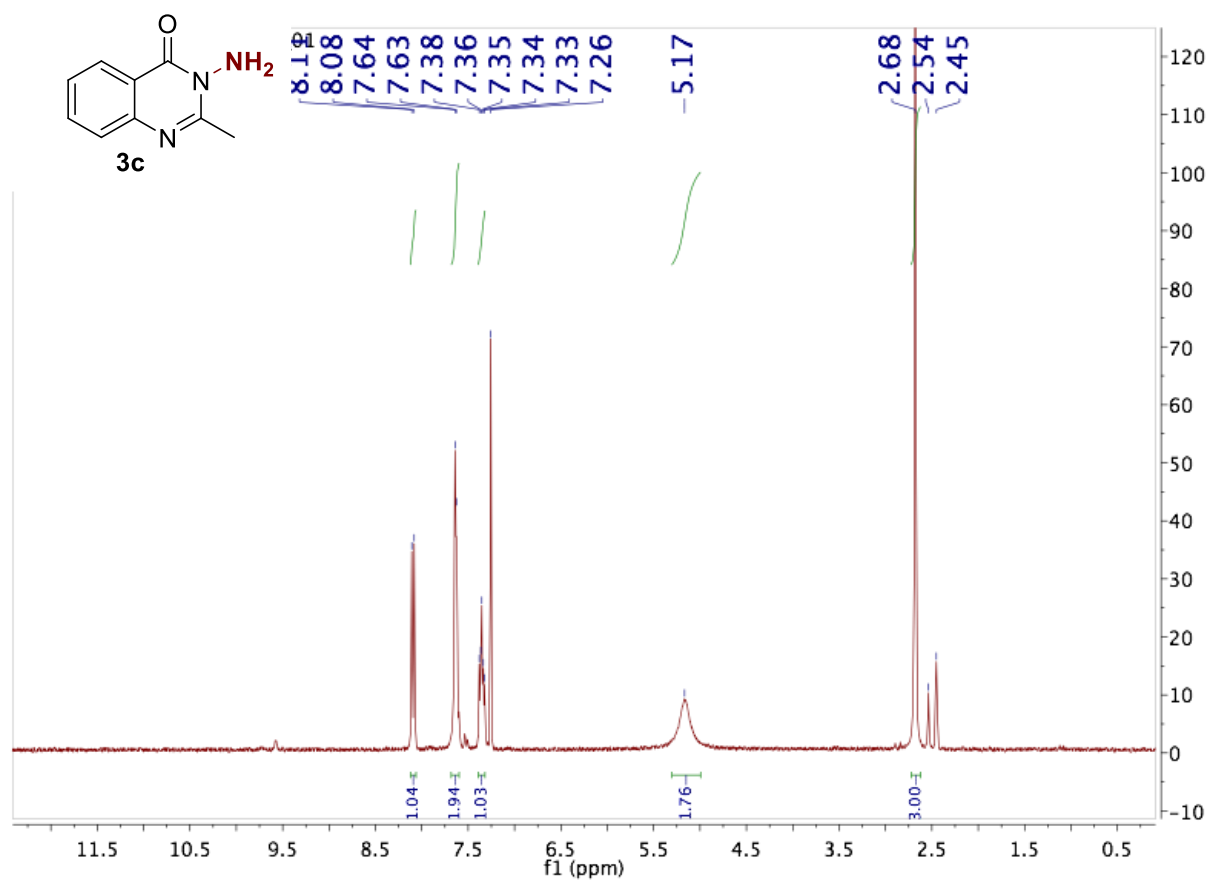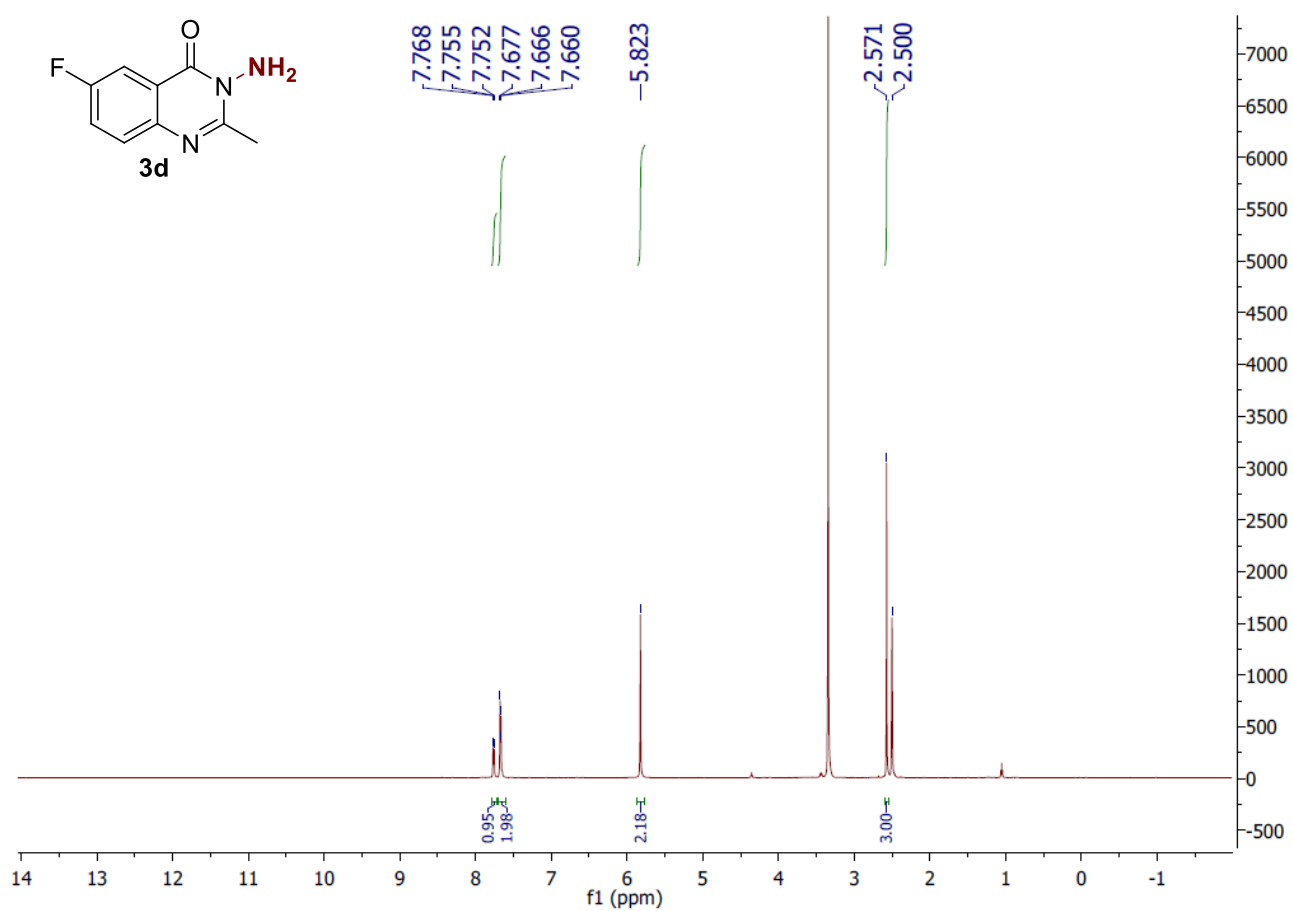

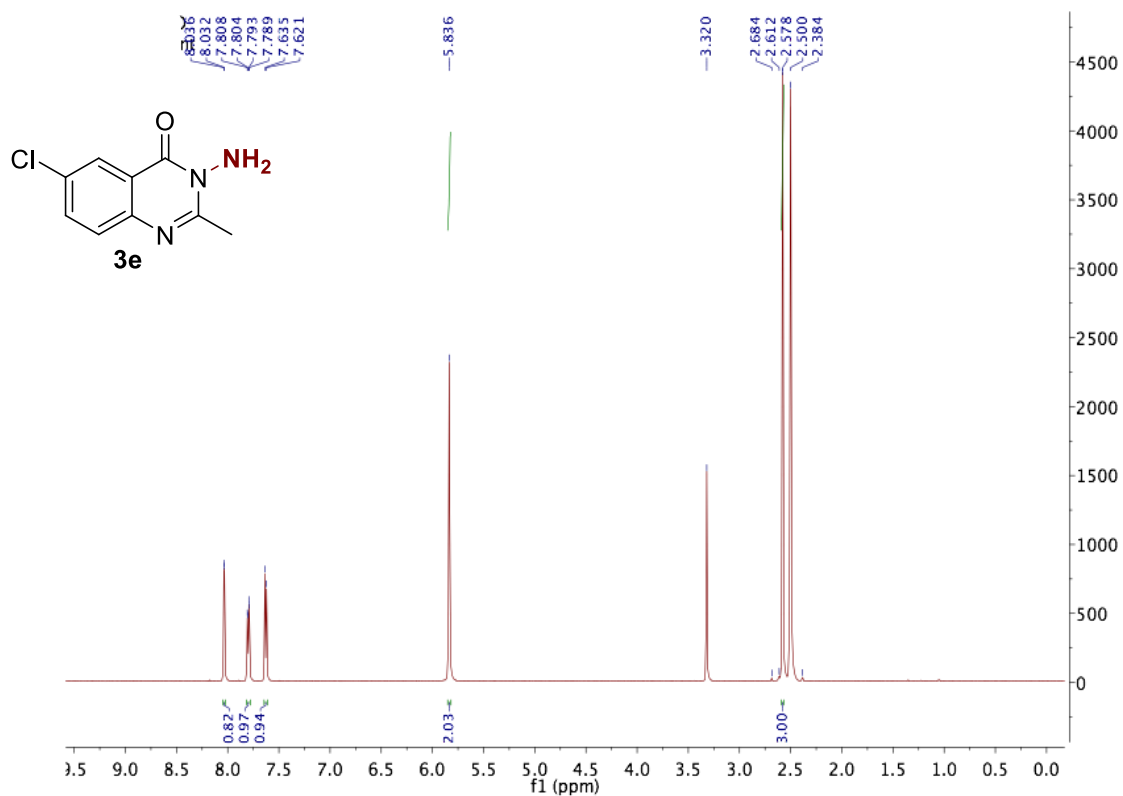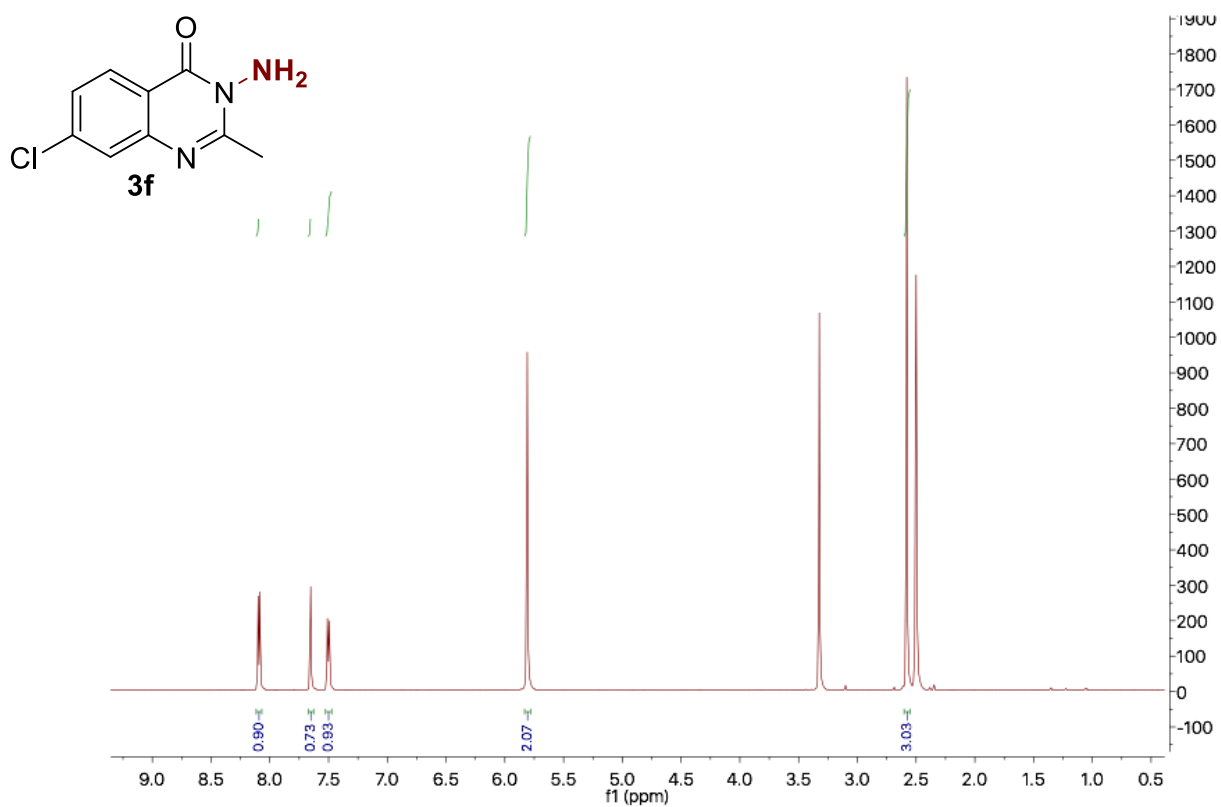

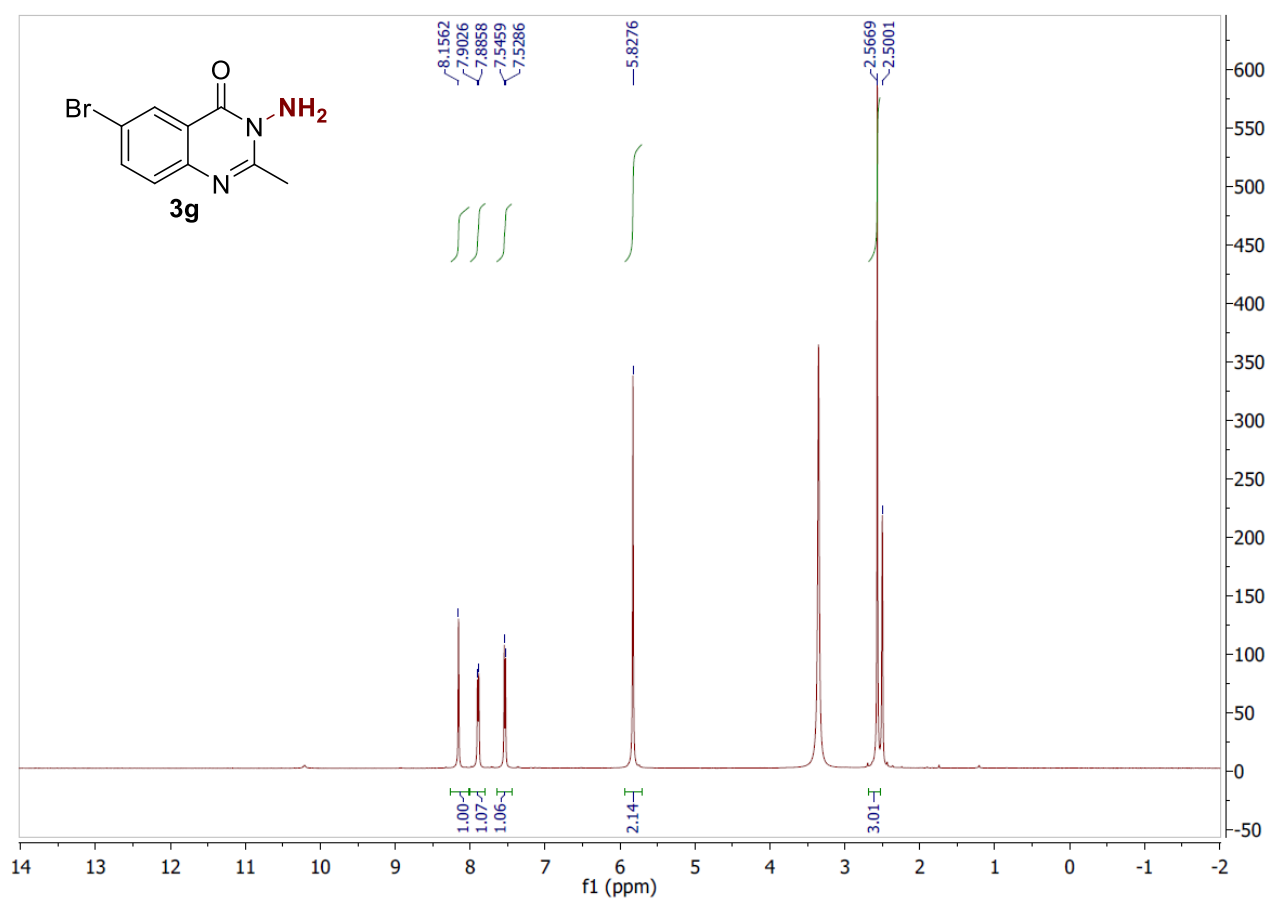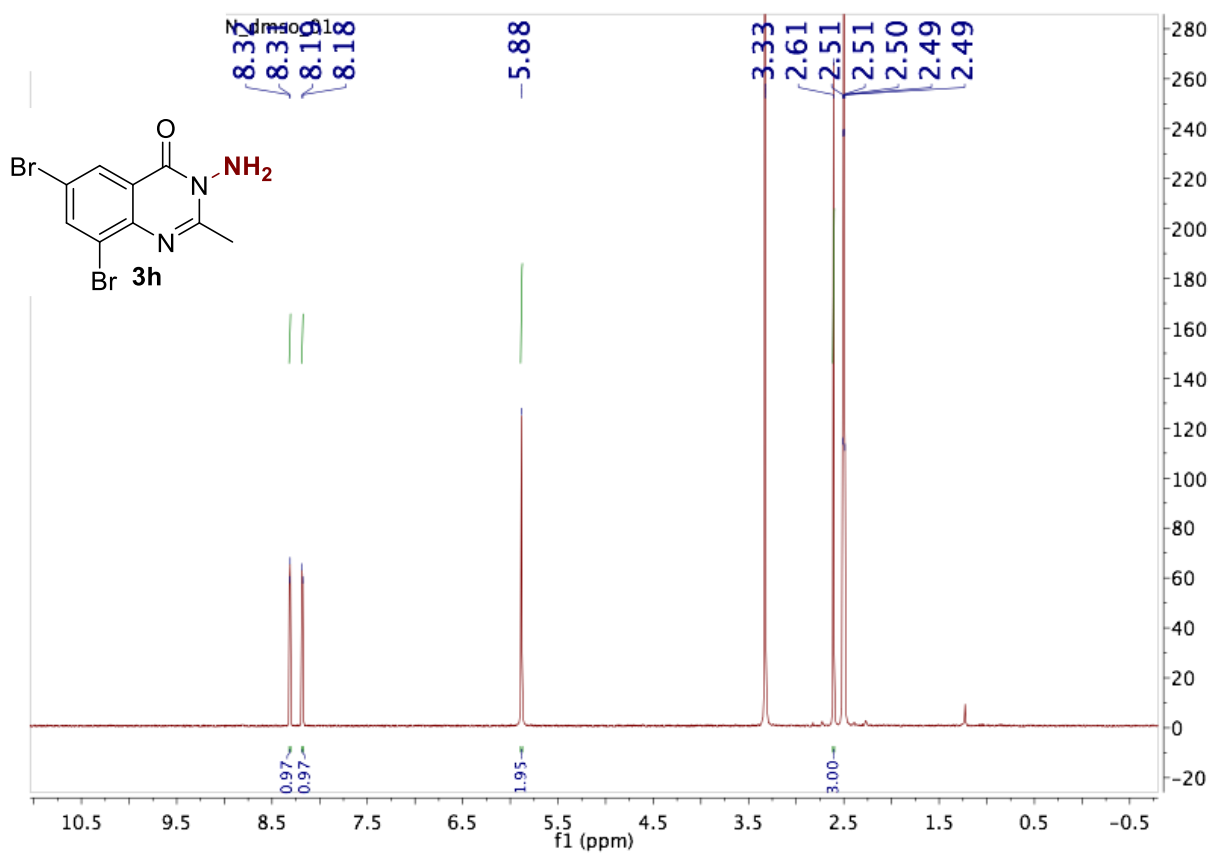

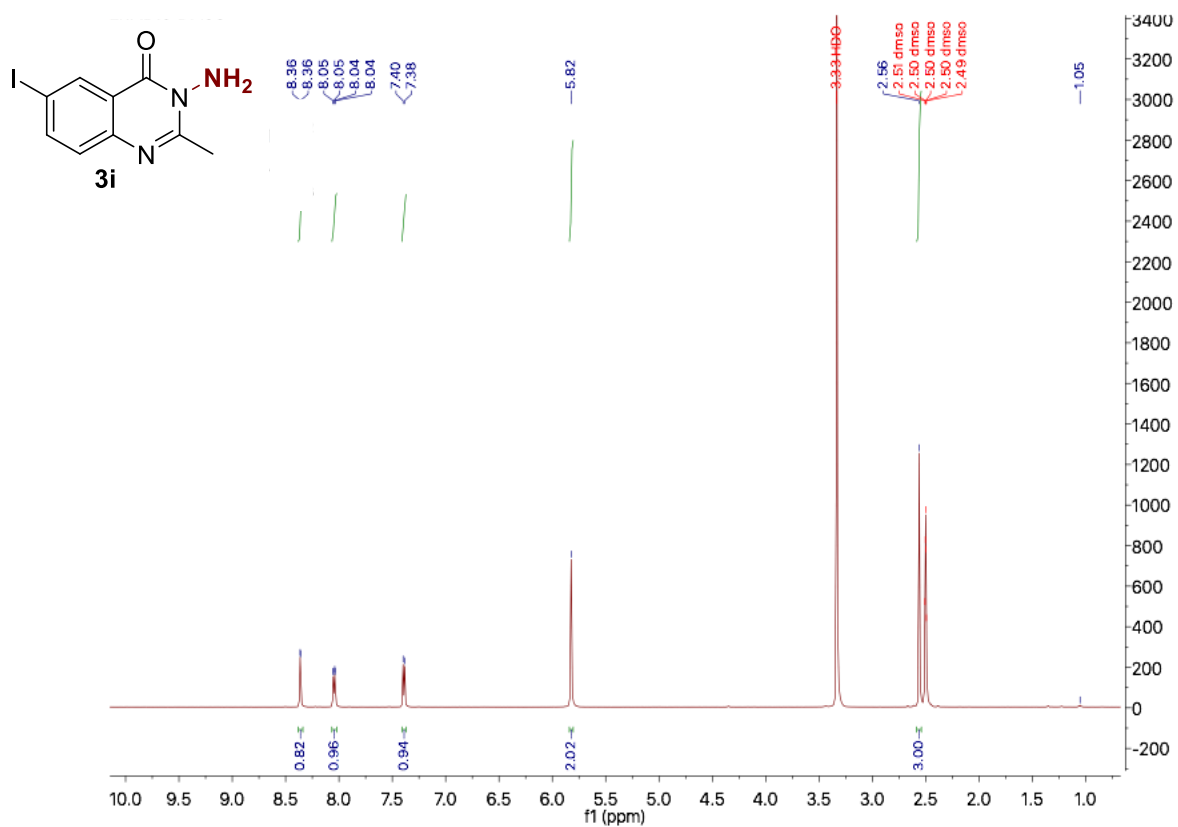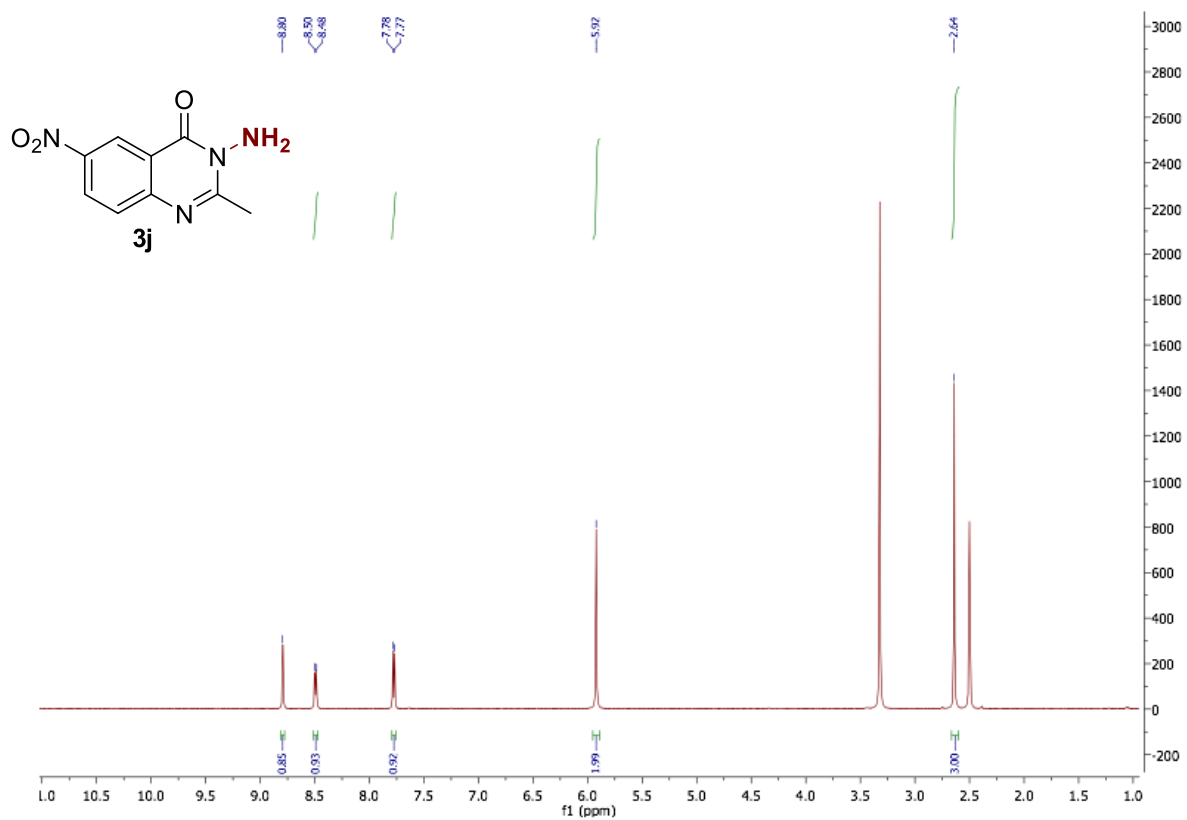

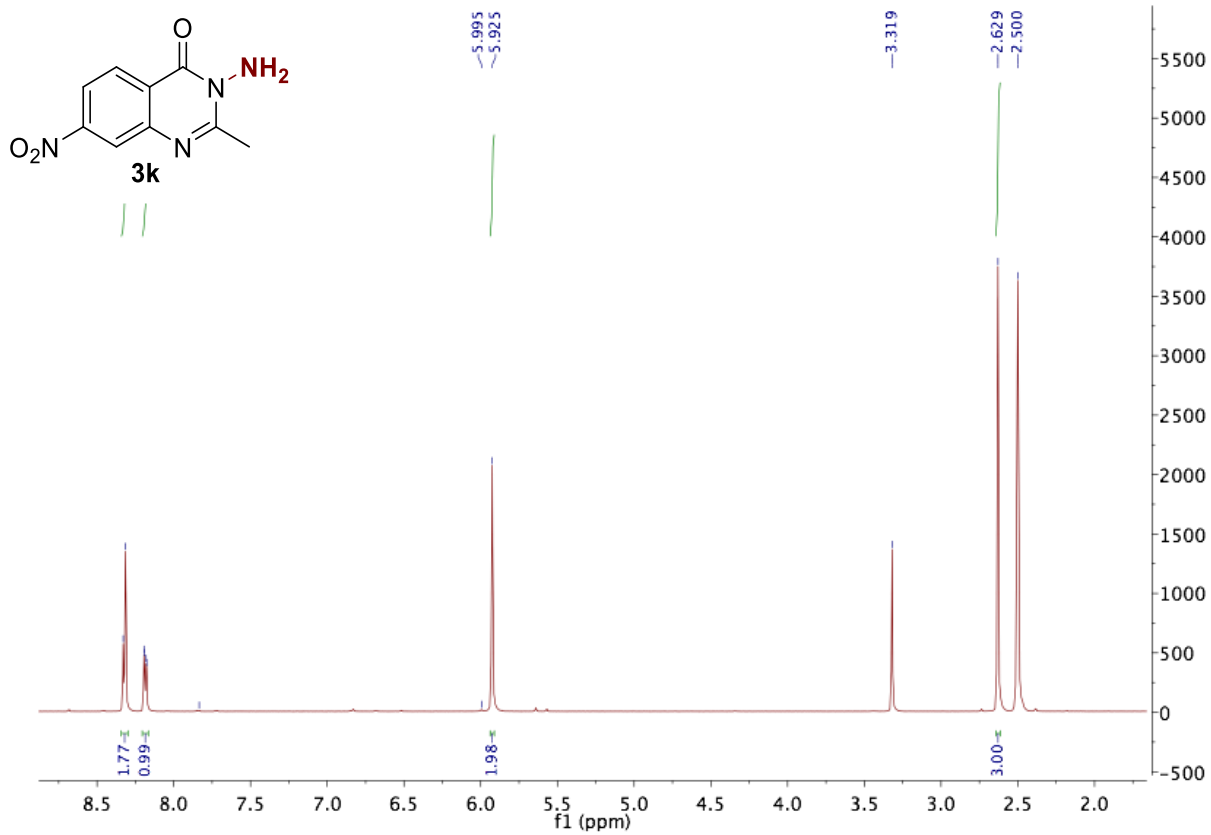



## 2. Copies of NMR spectra of acetamides 5–8

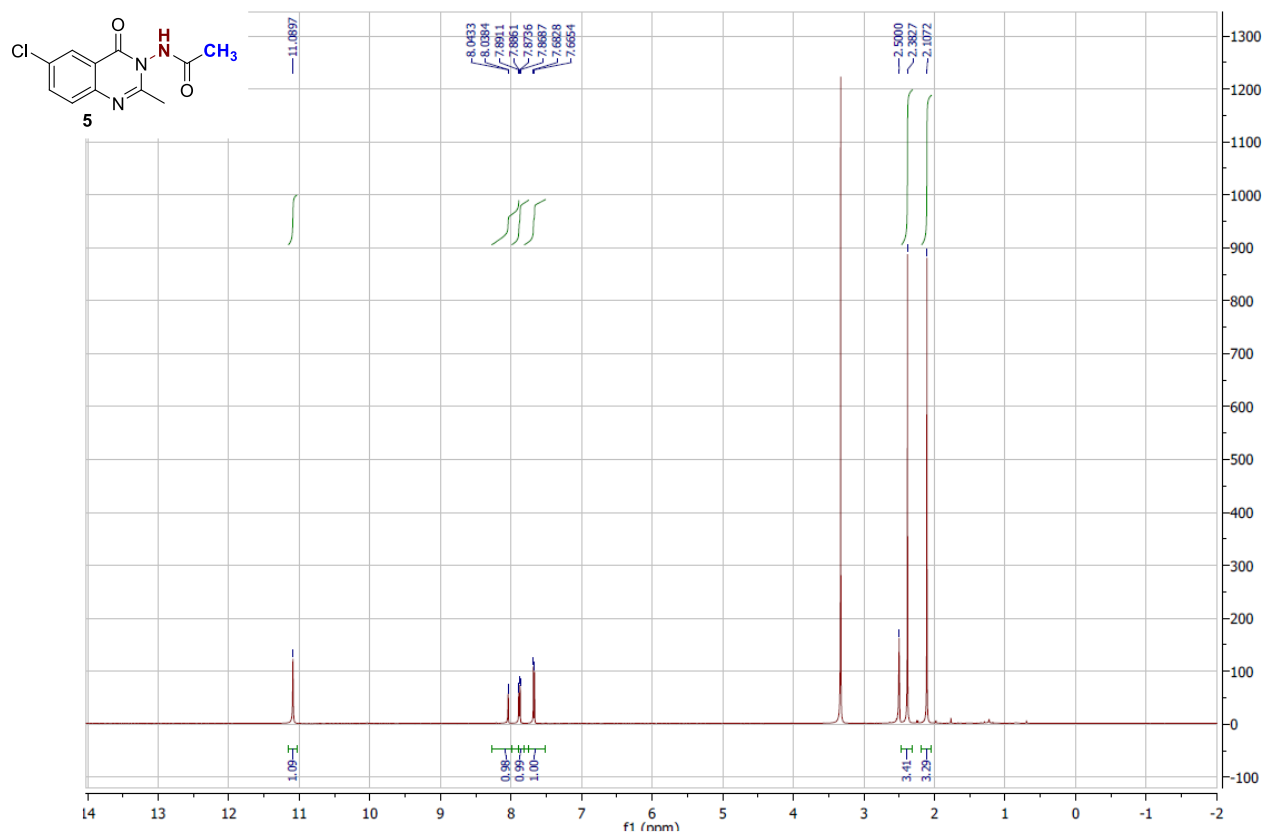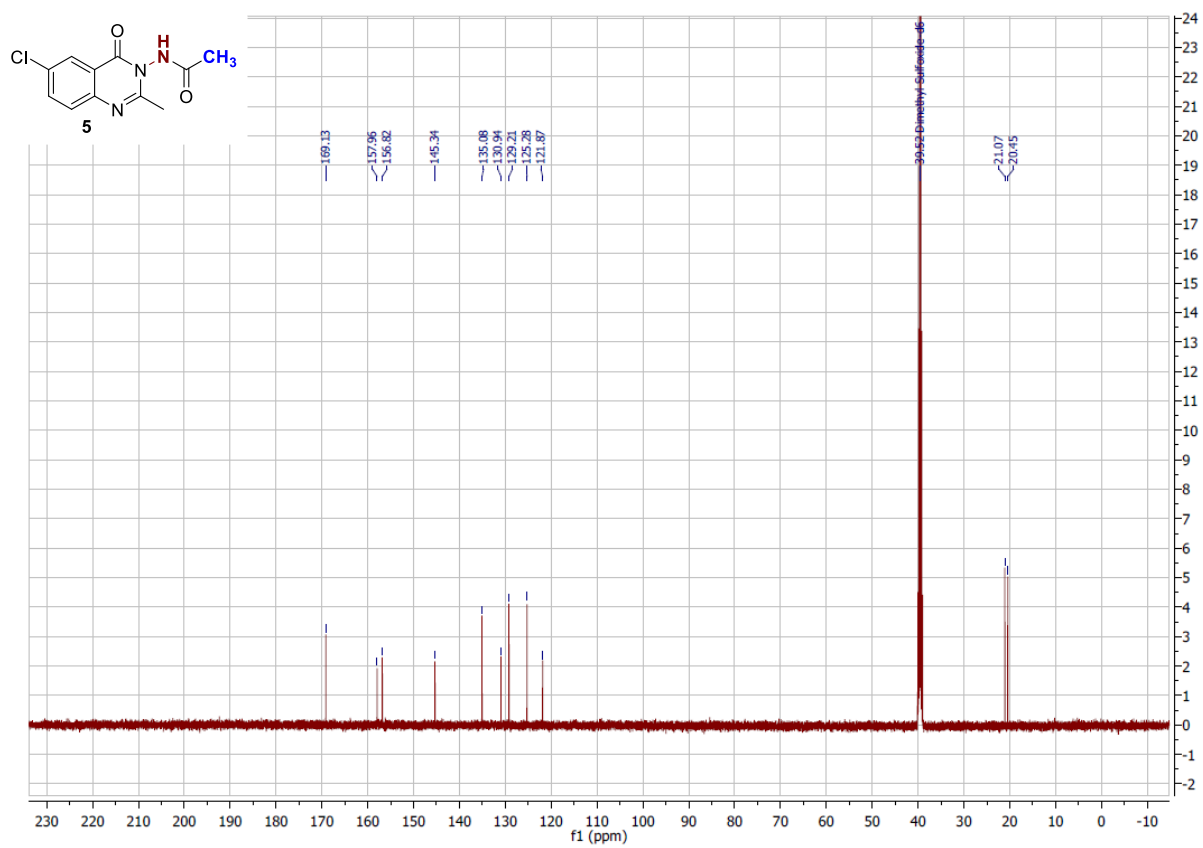

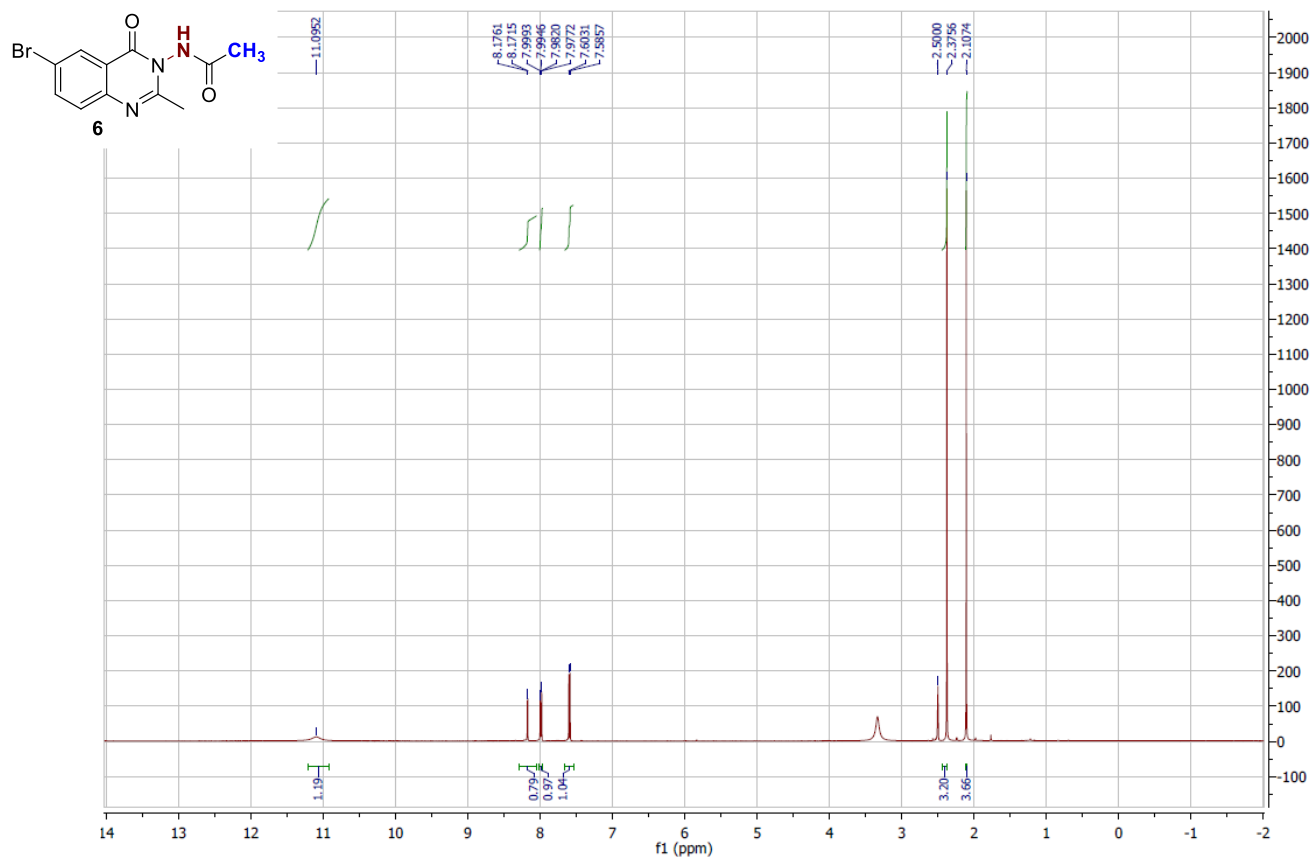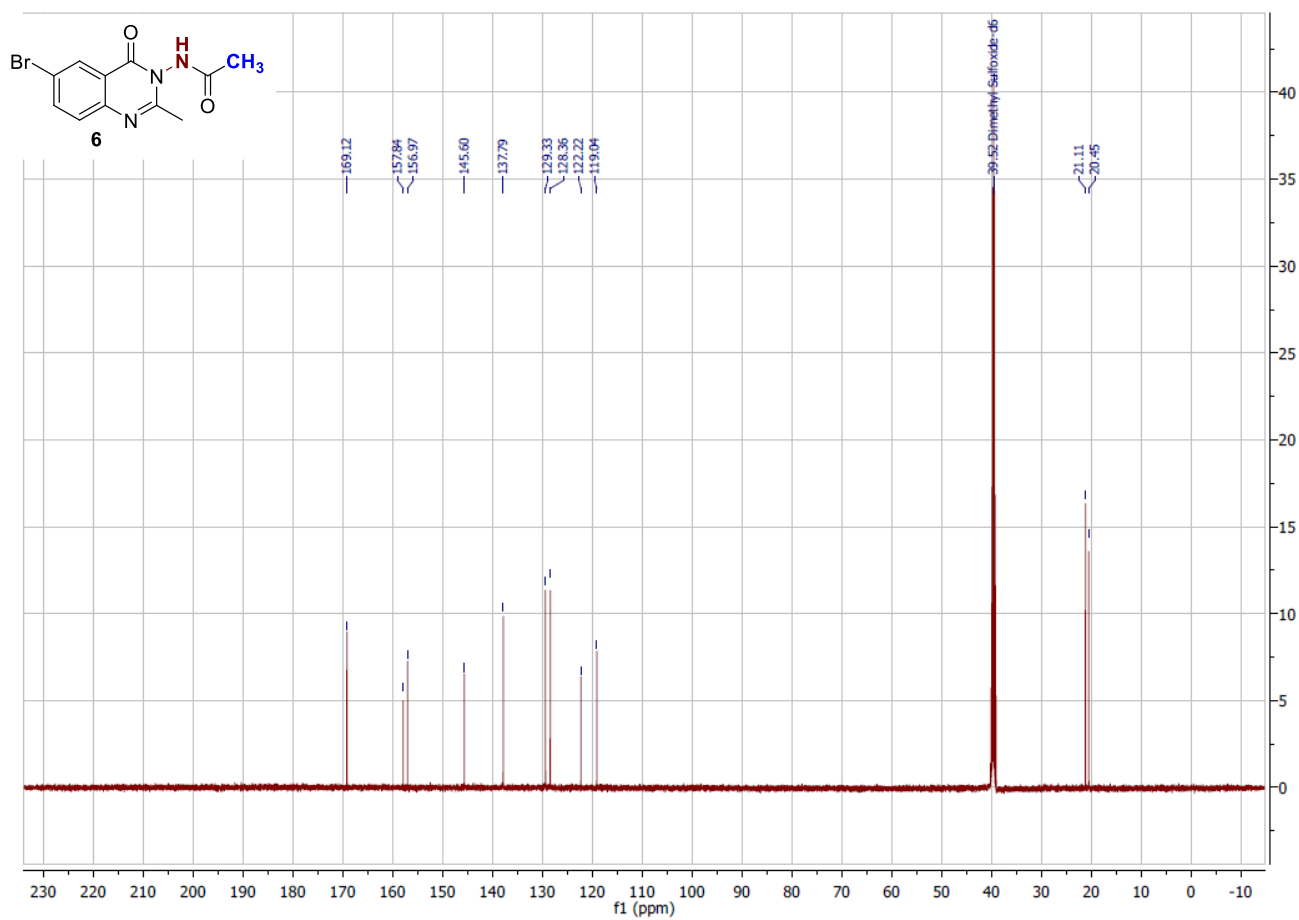

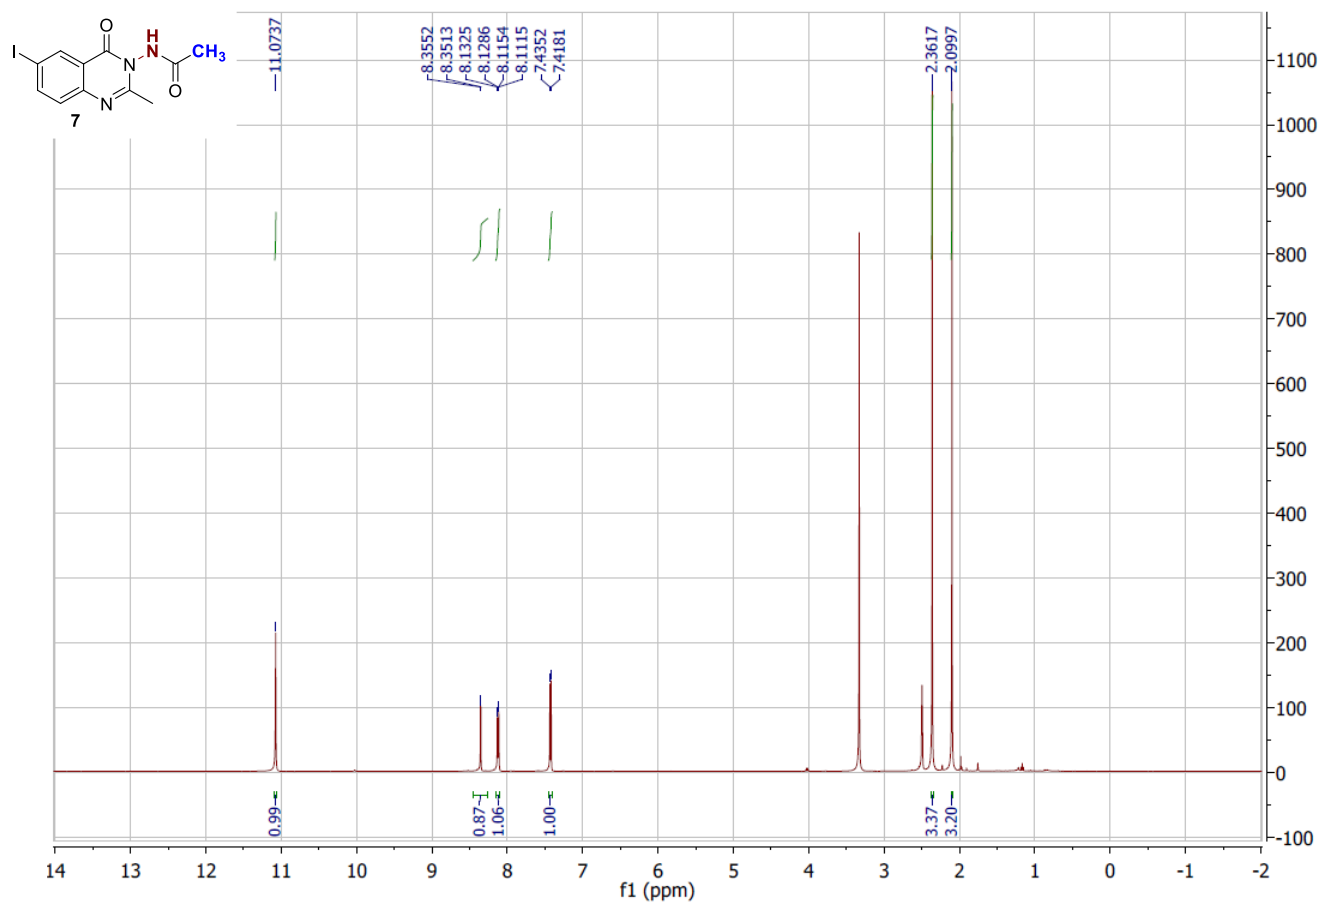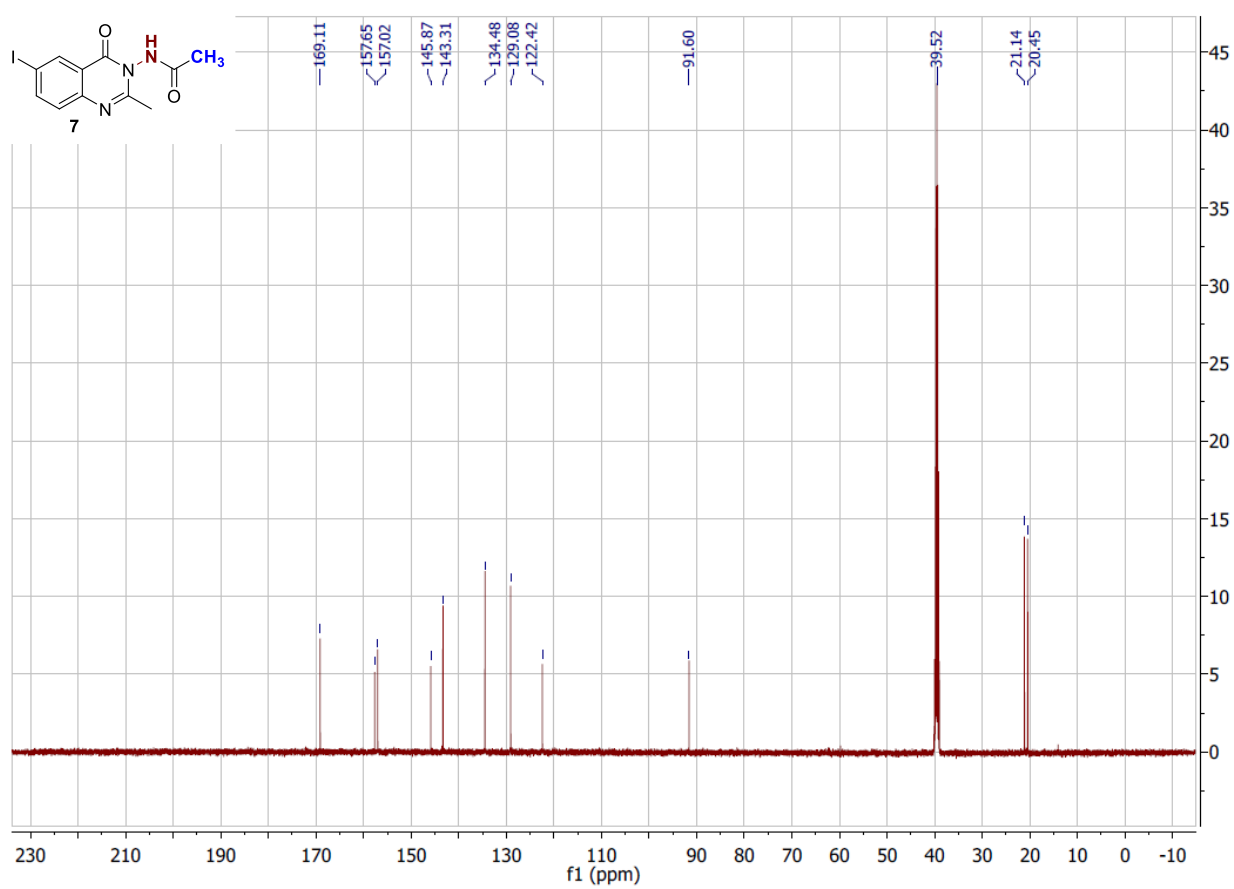

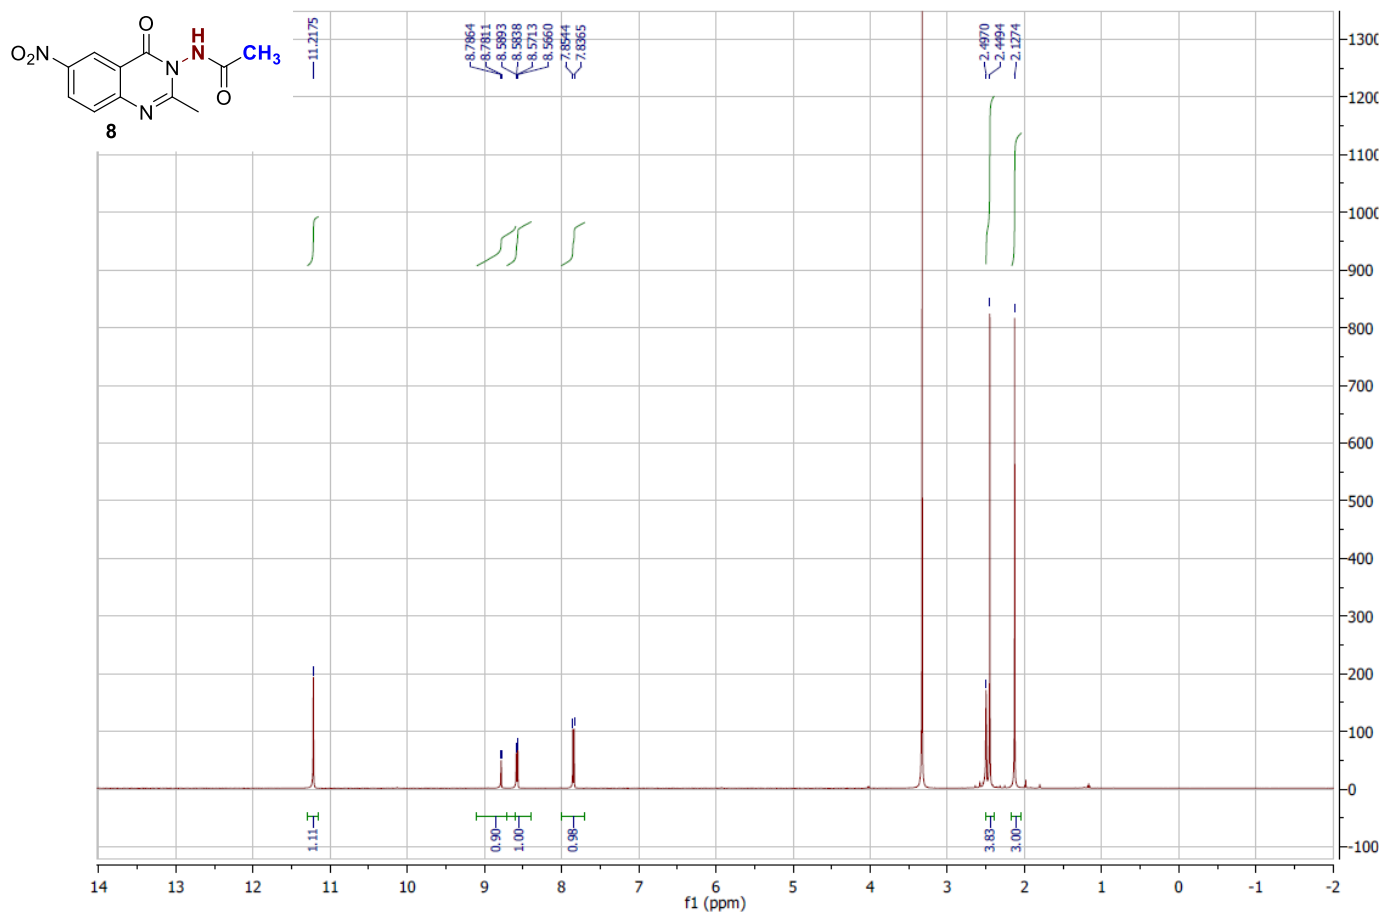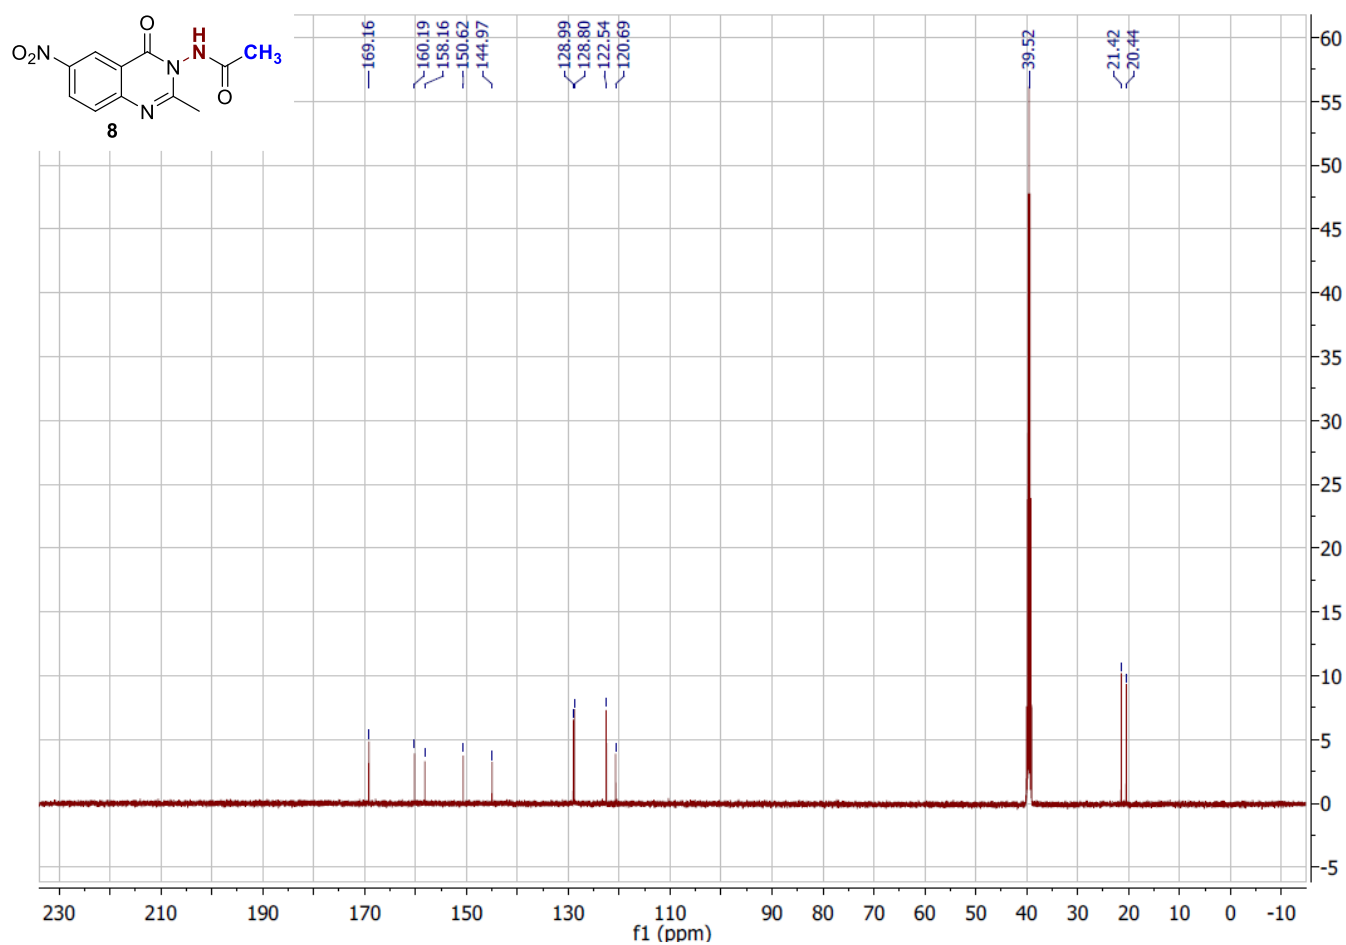

### 3. Copies of NMR spectra of quinazolinone arylamides 9-19

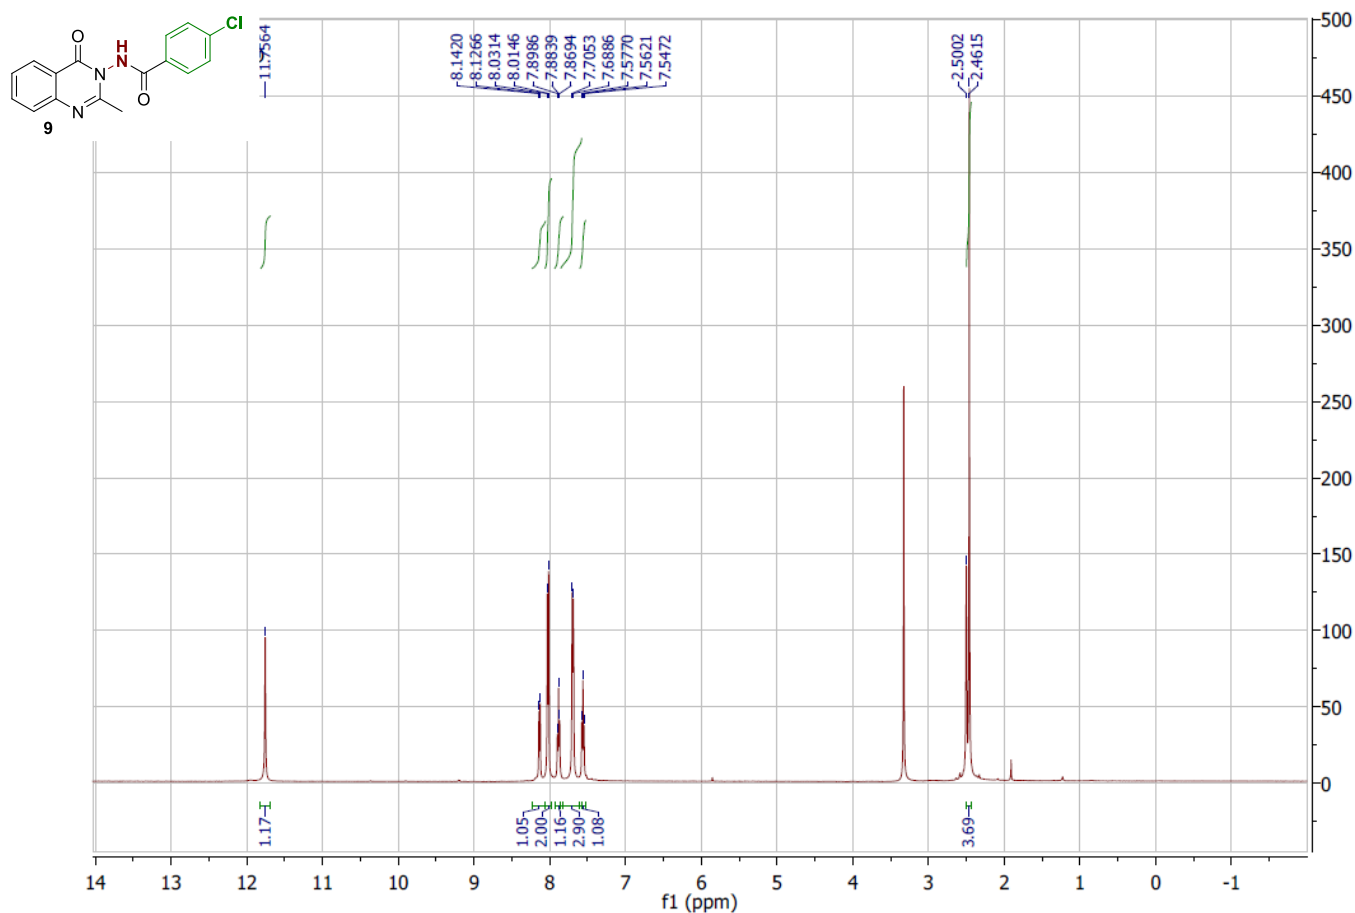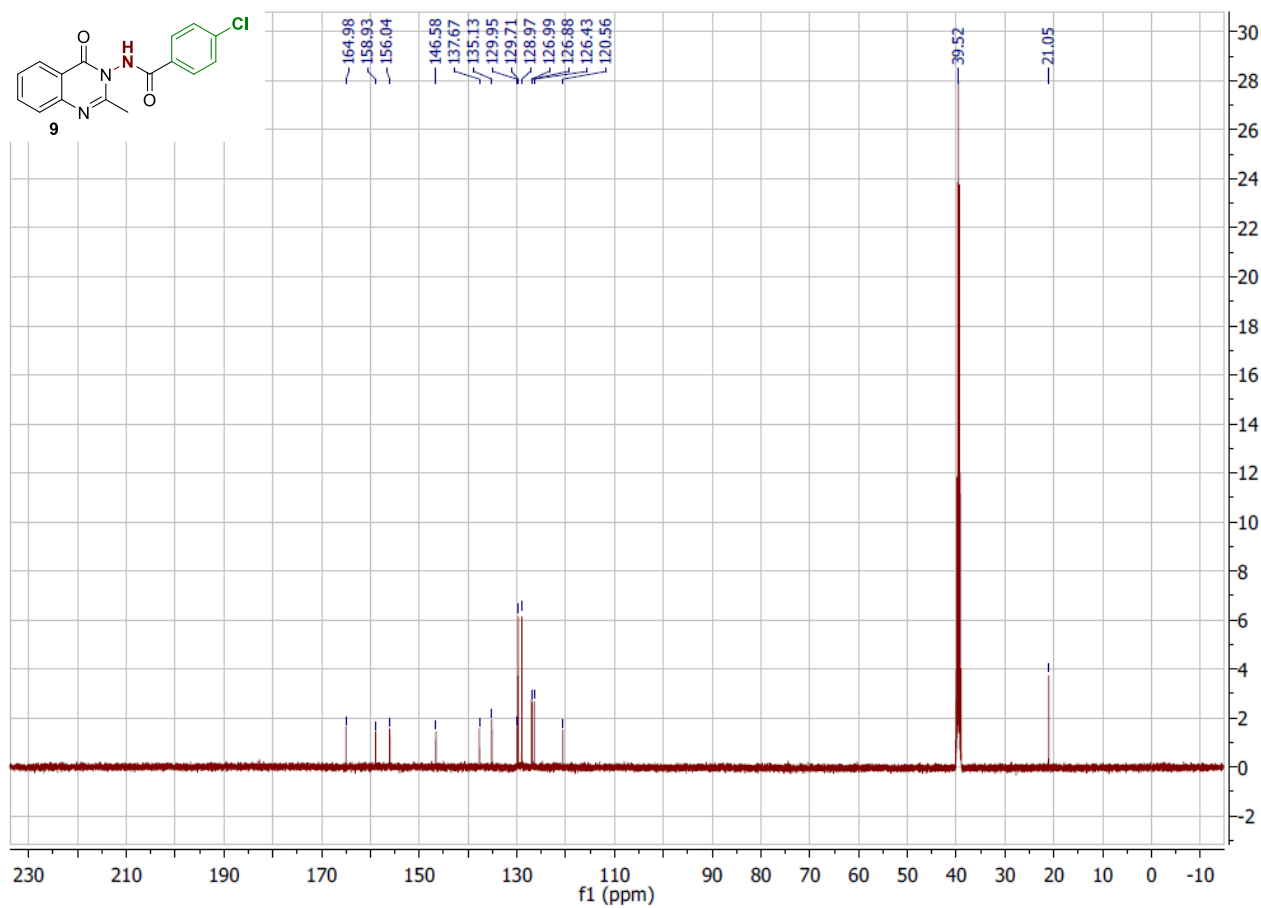

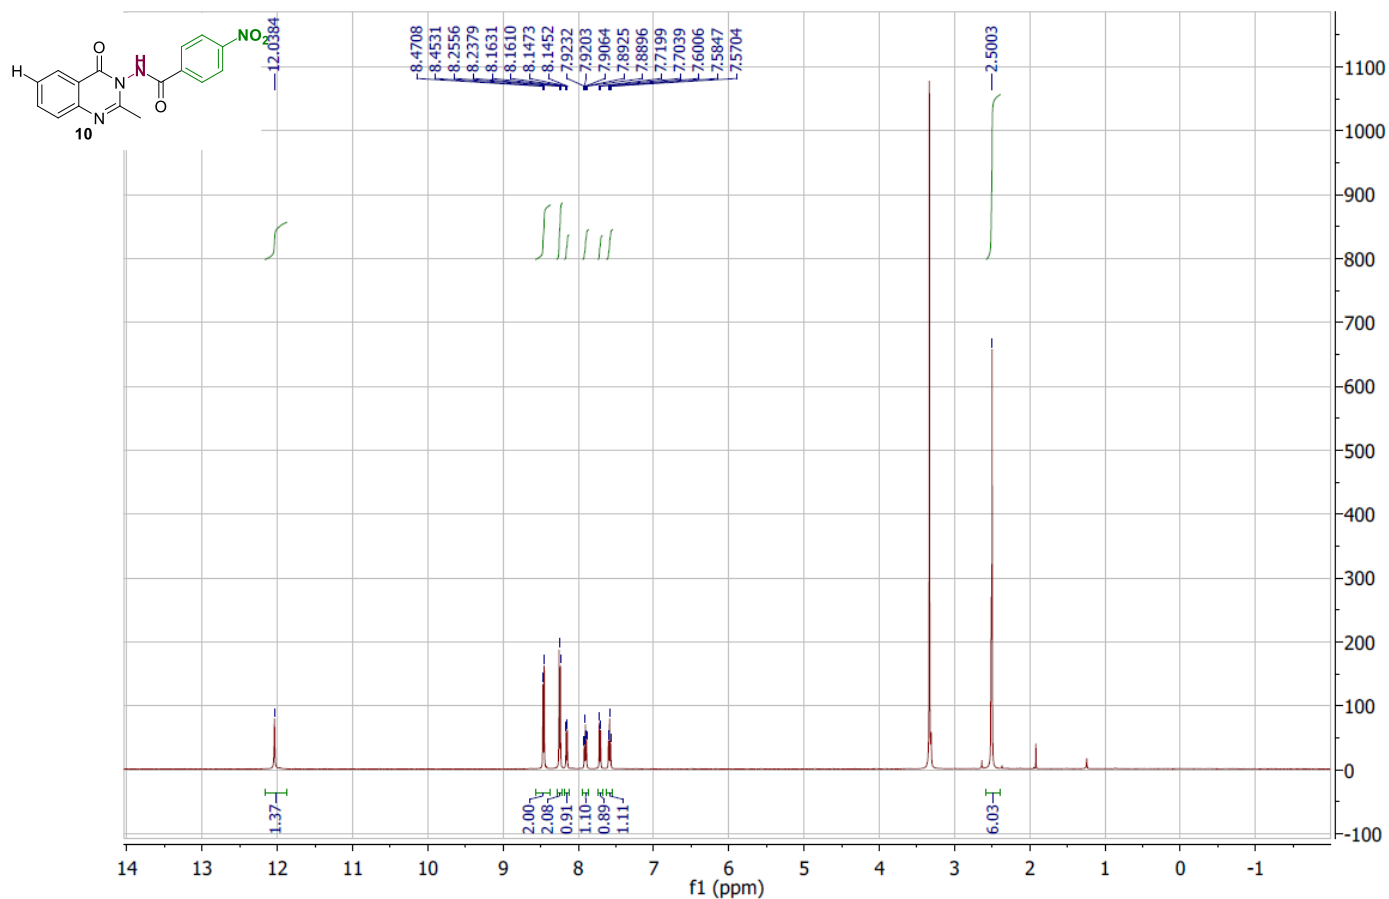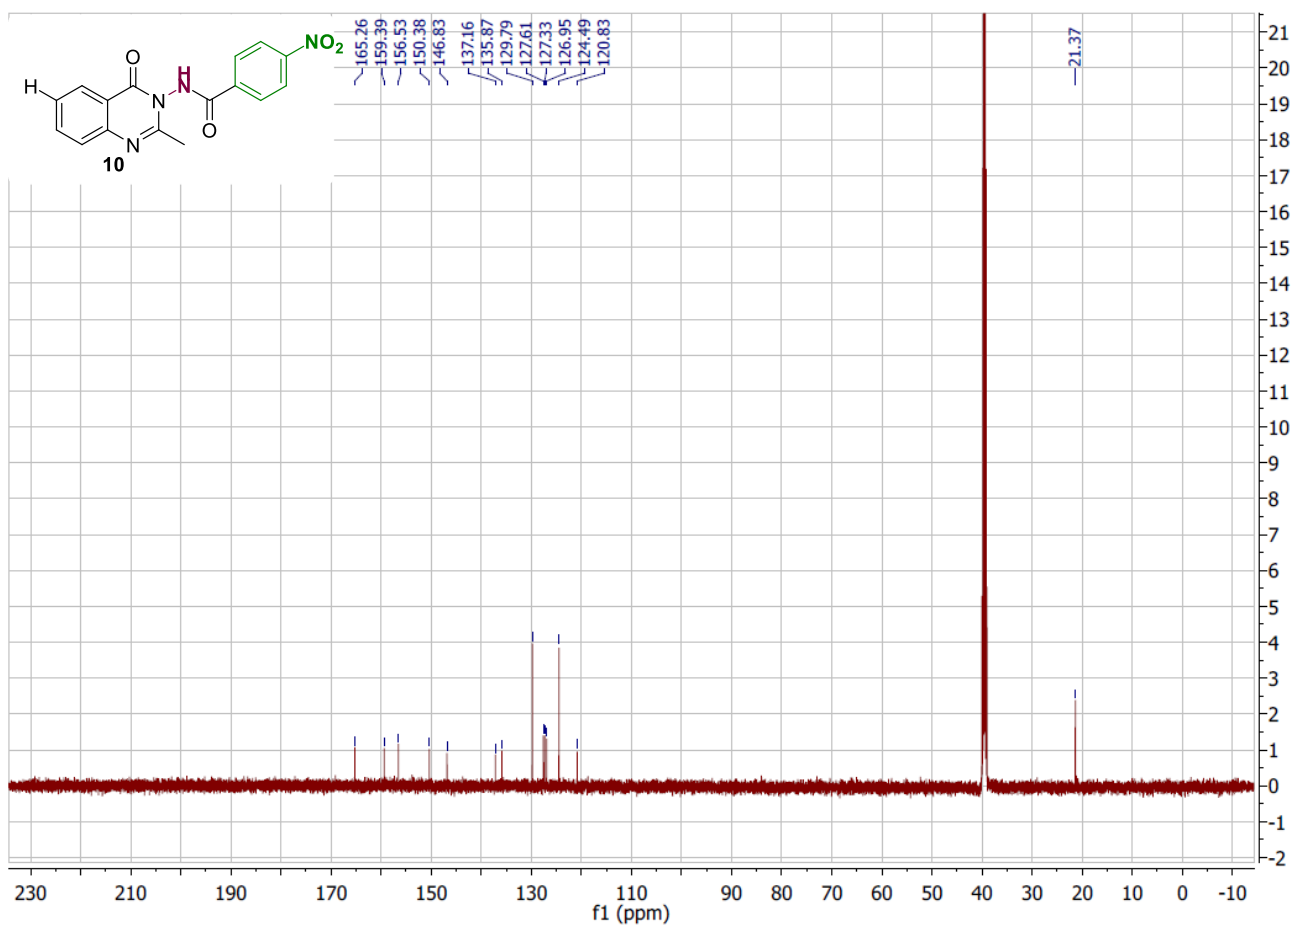

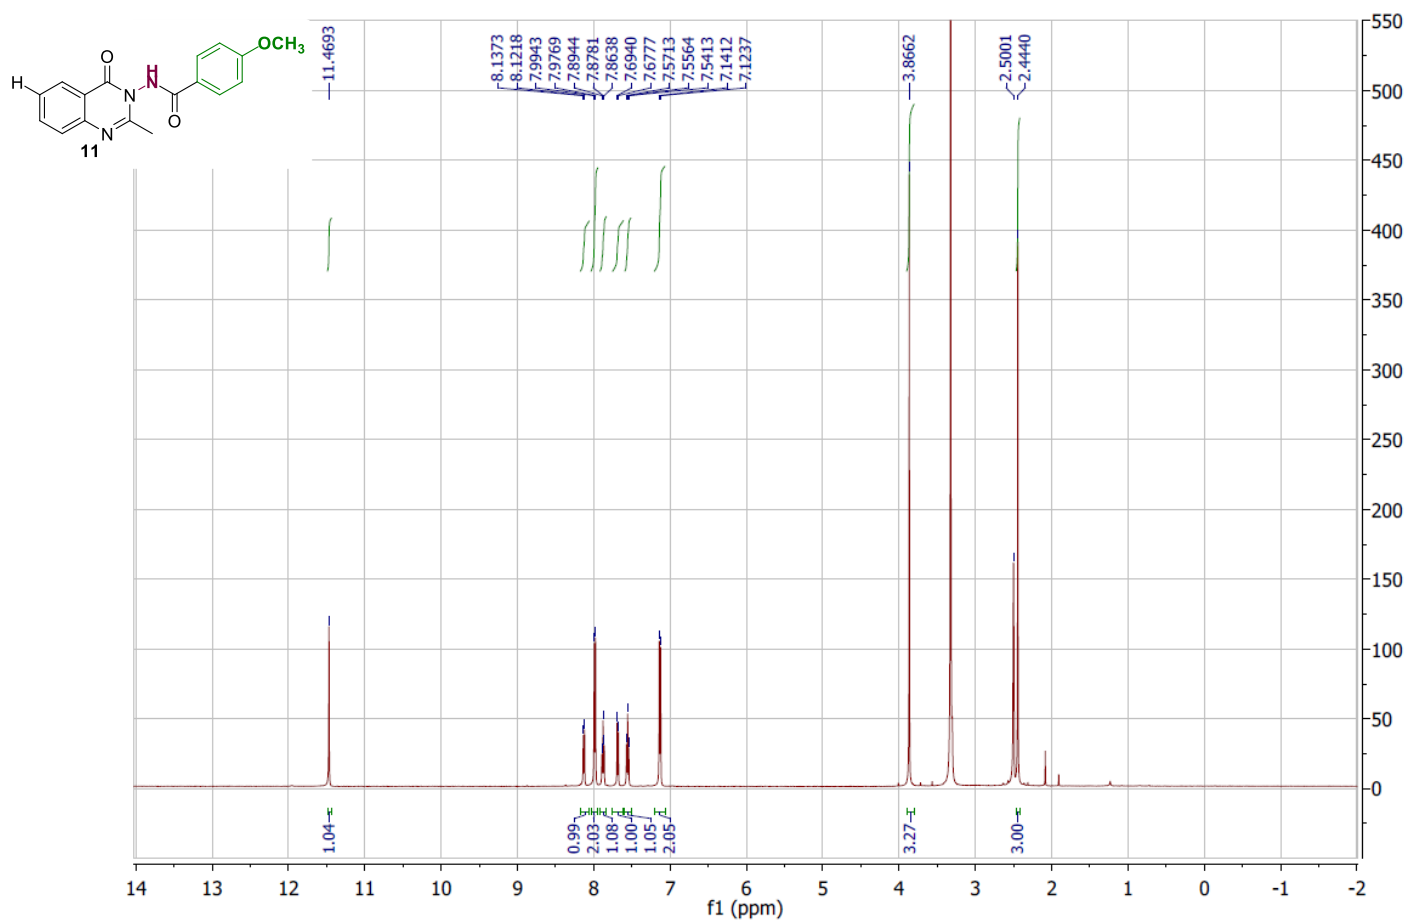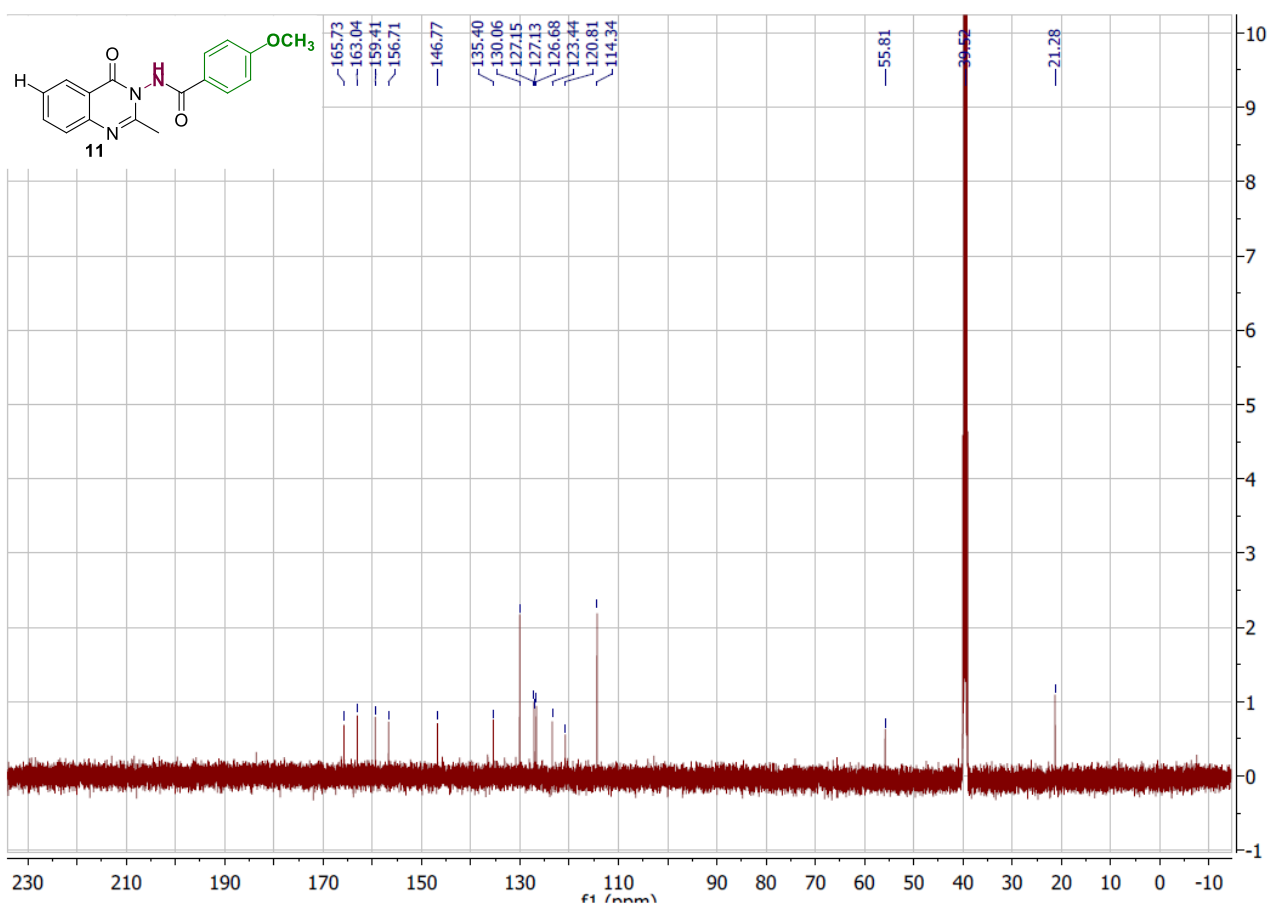

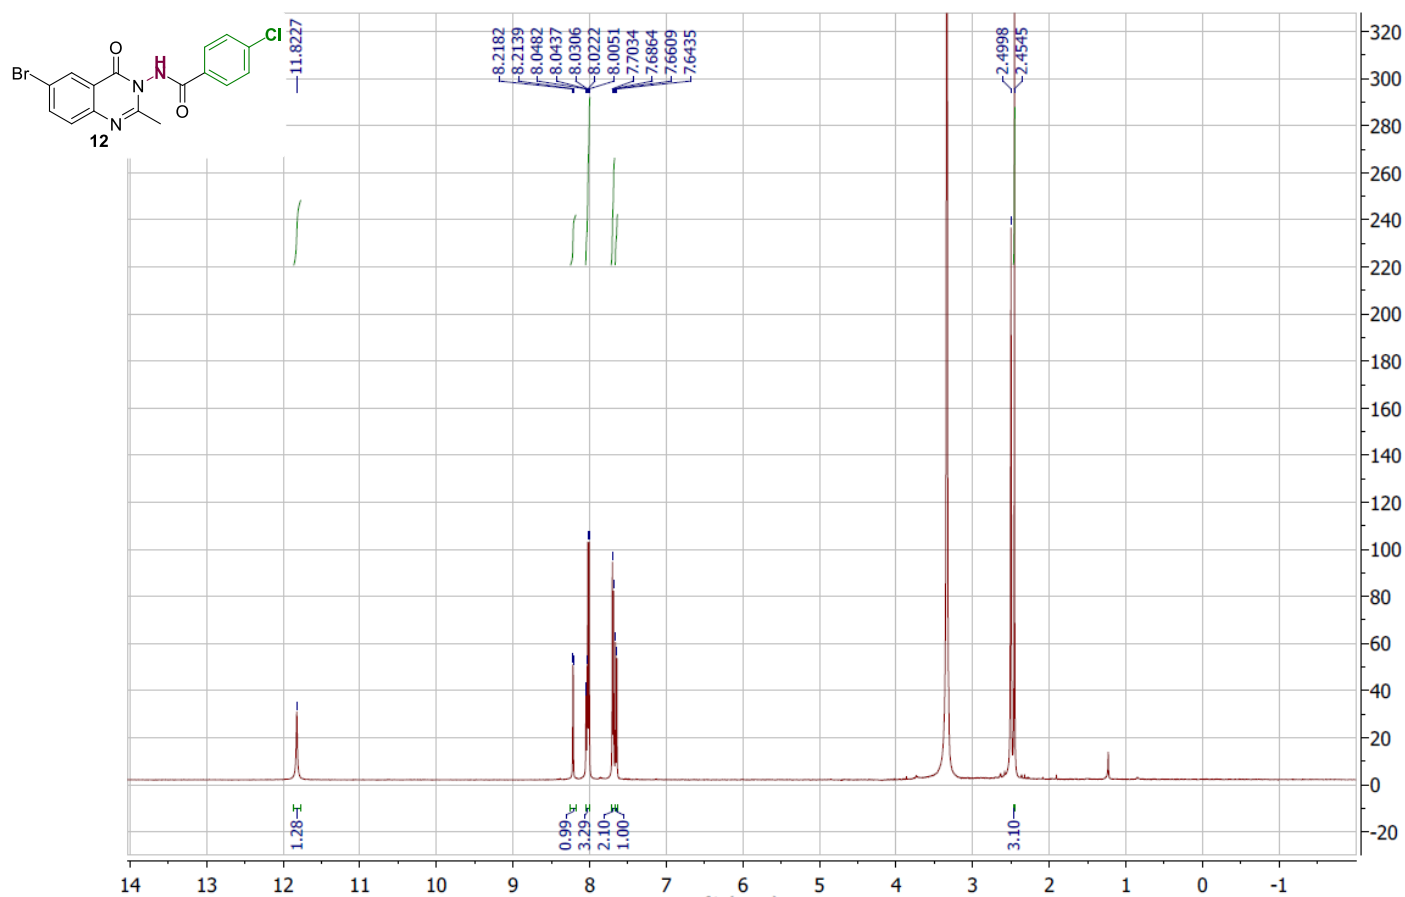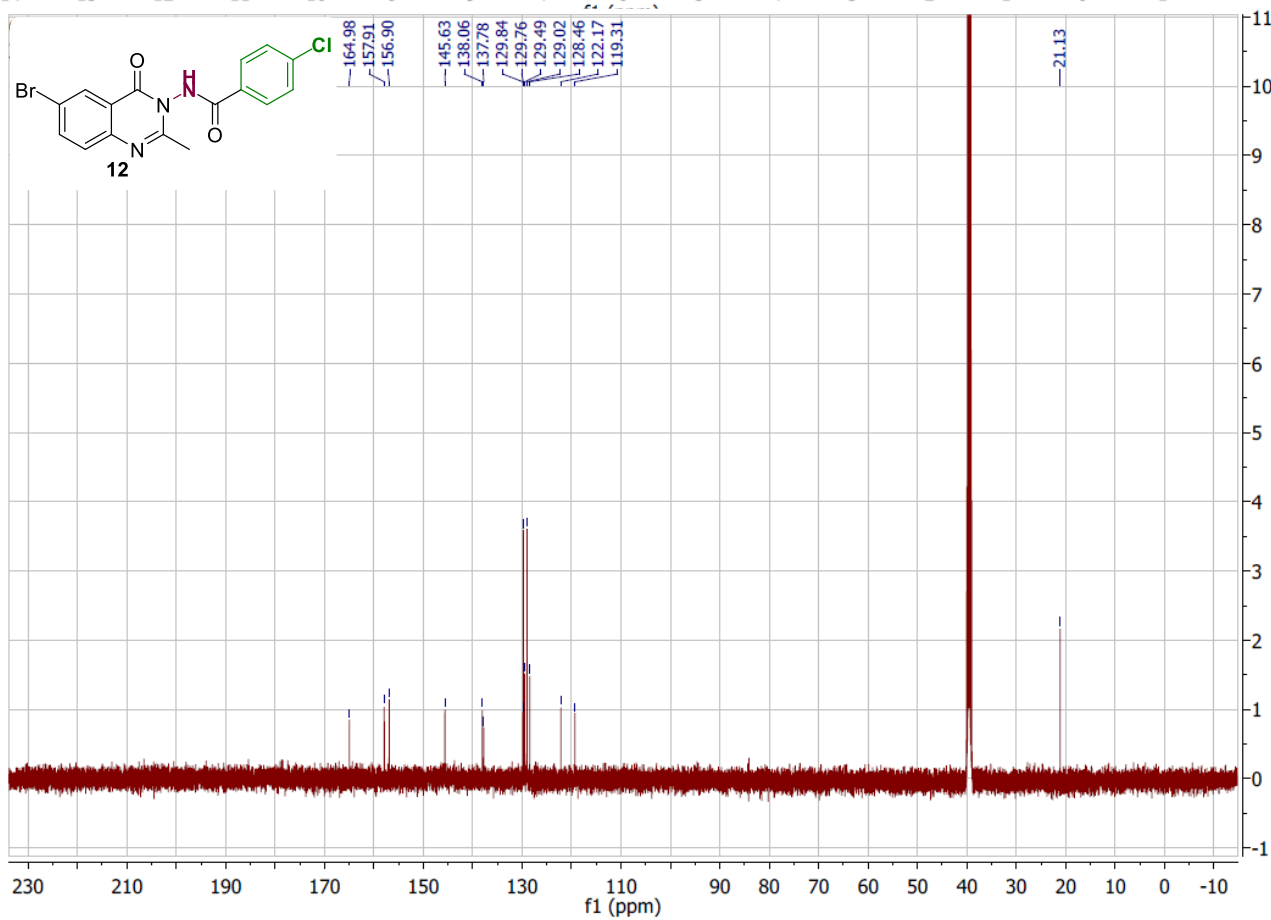



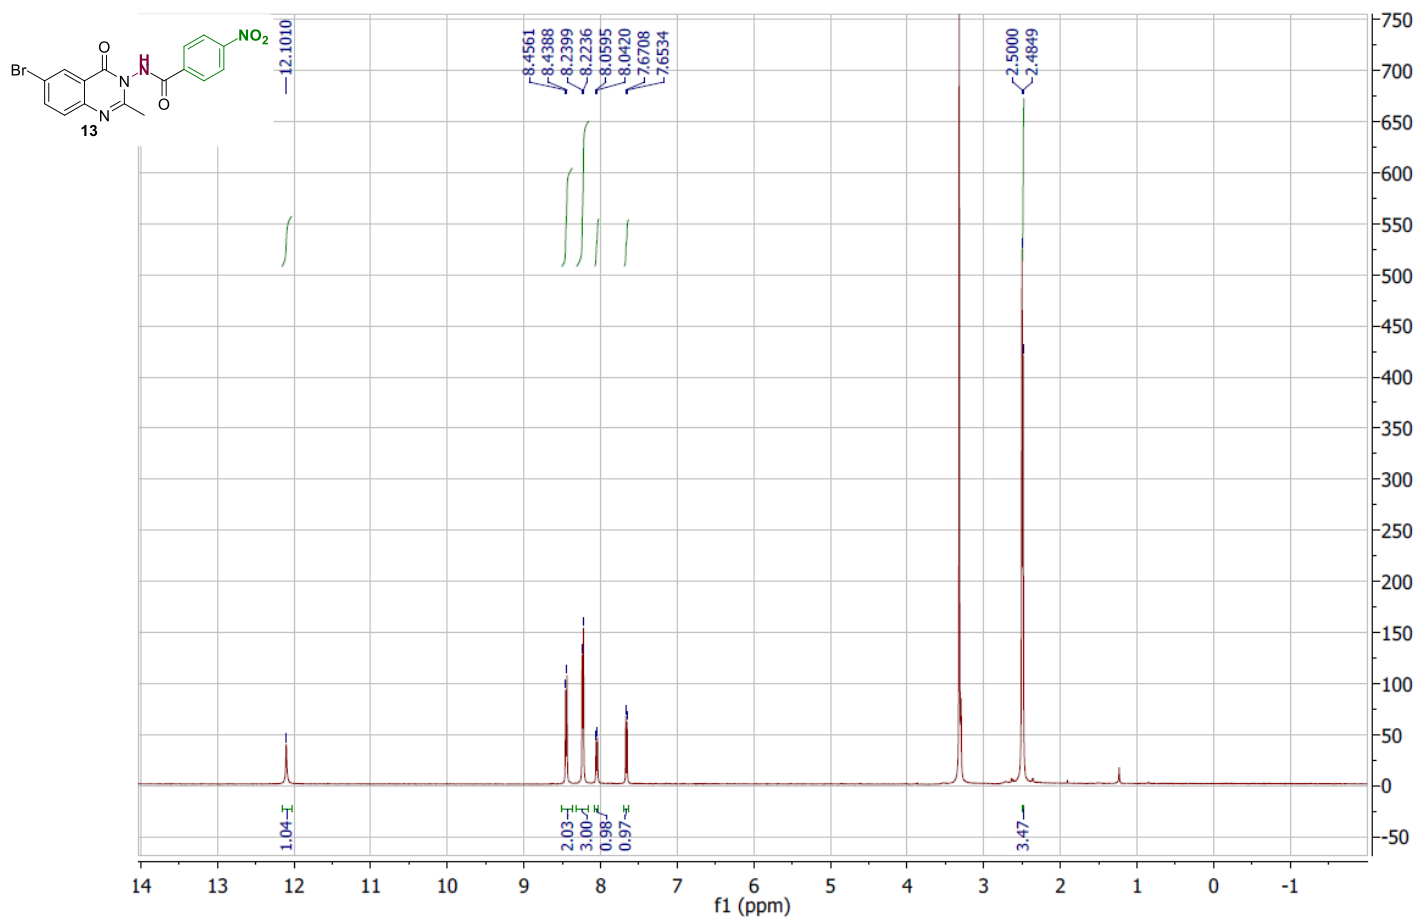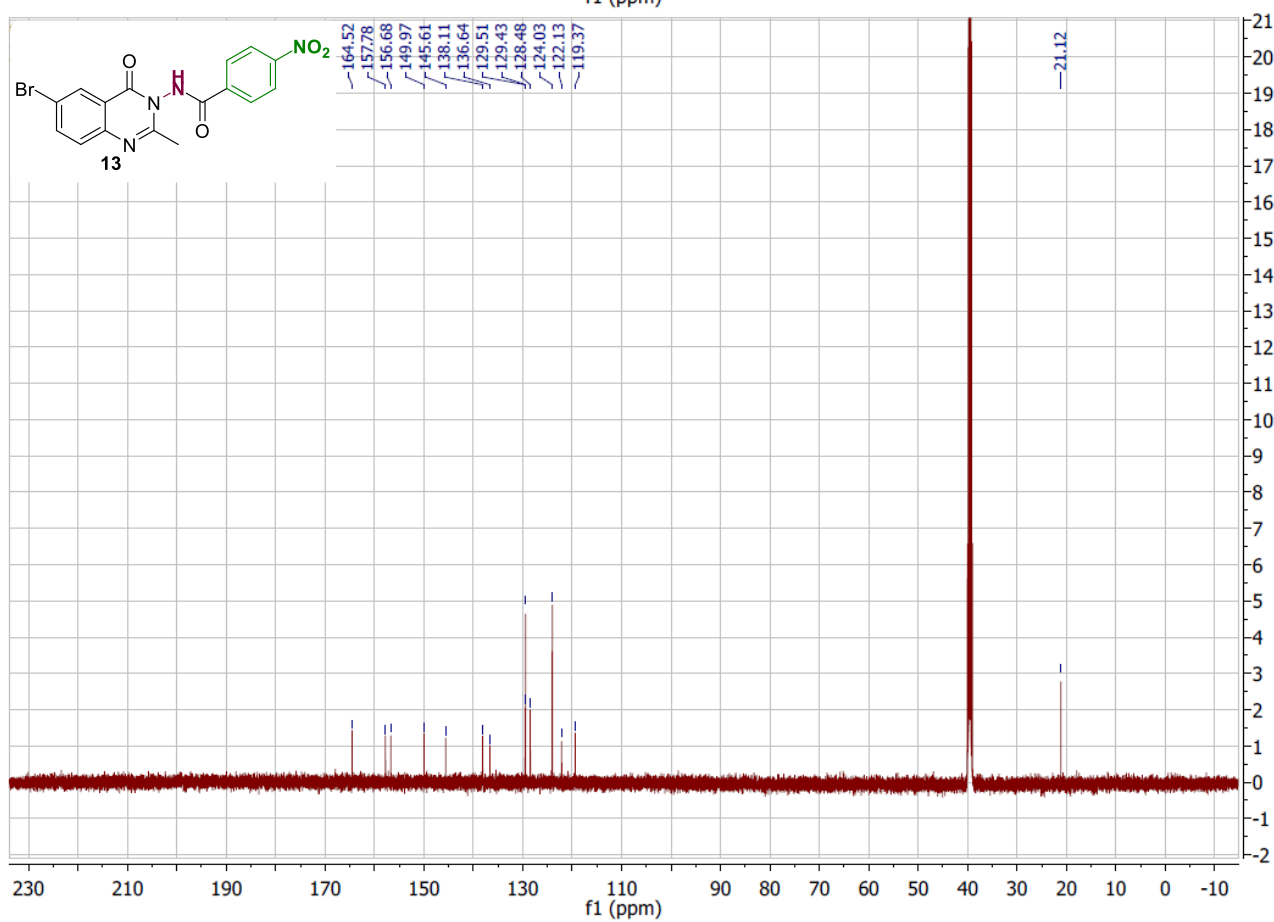

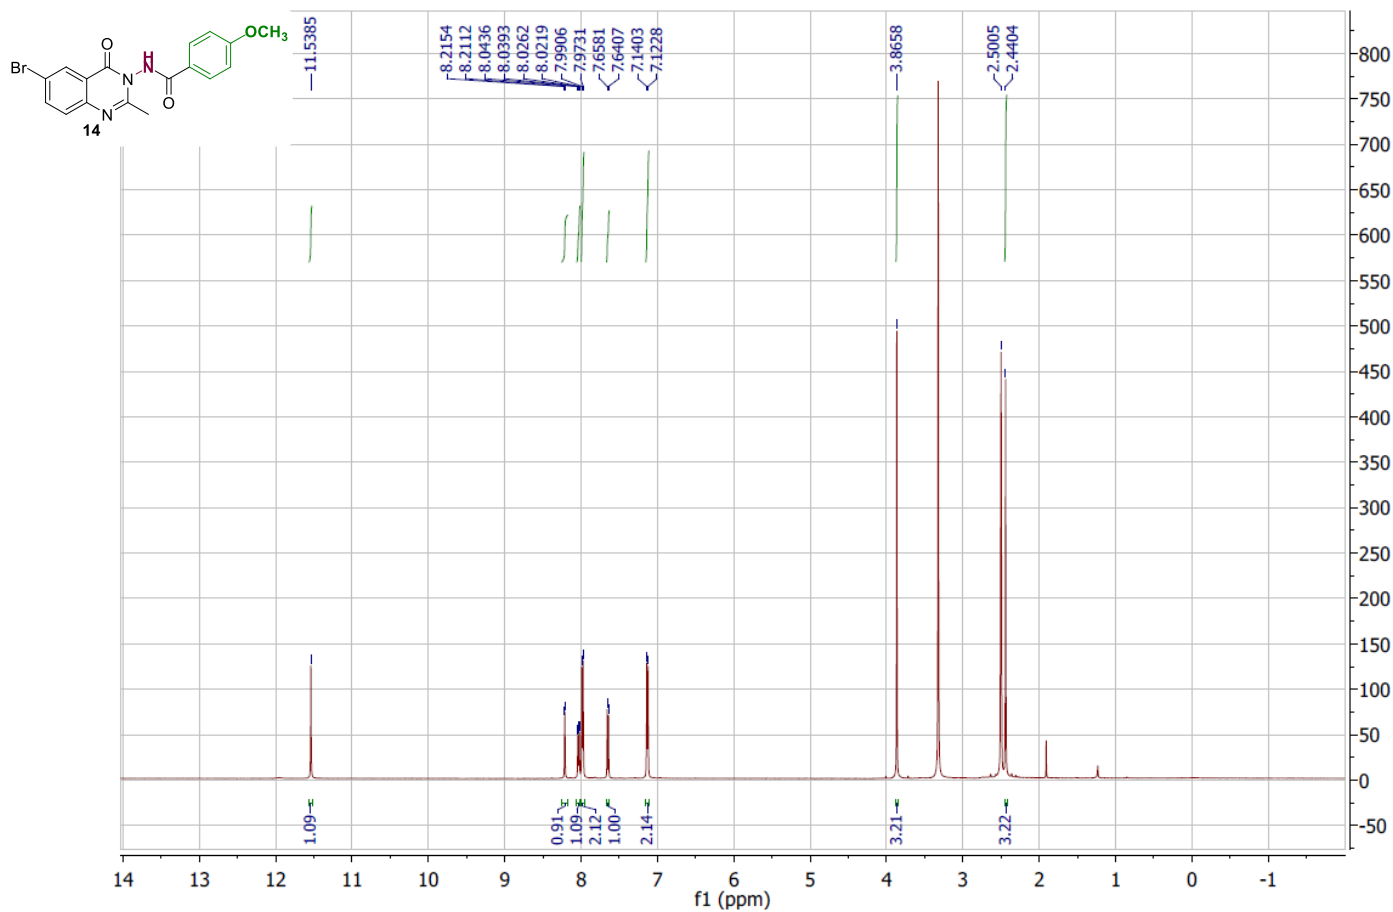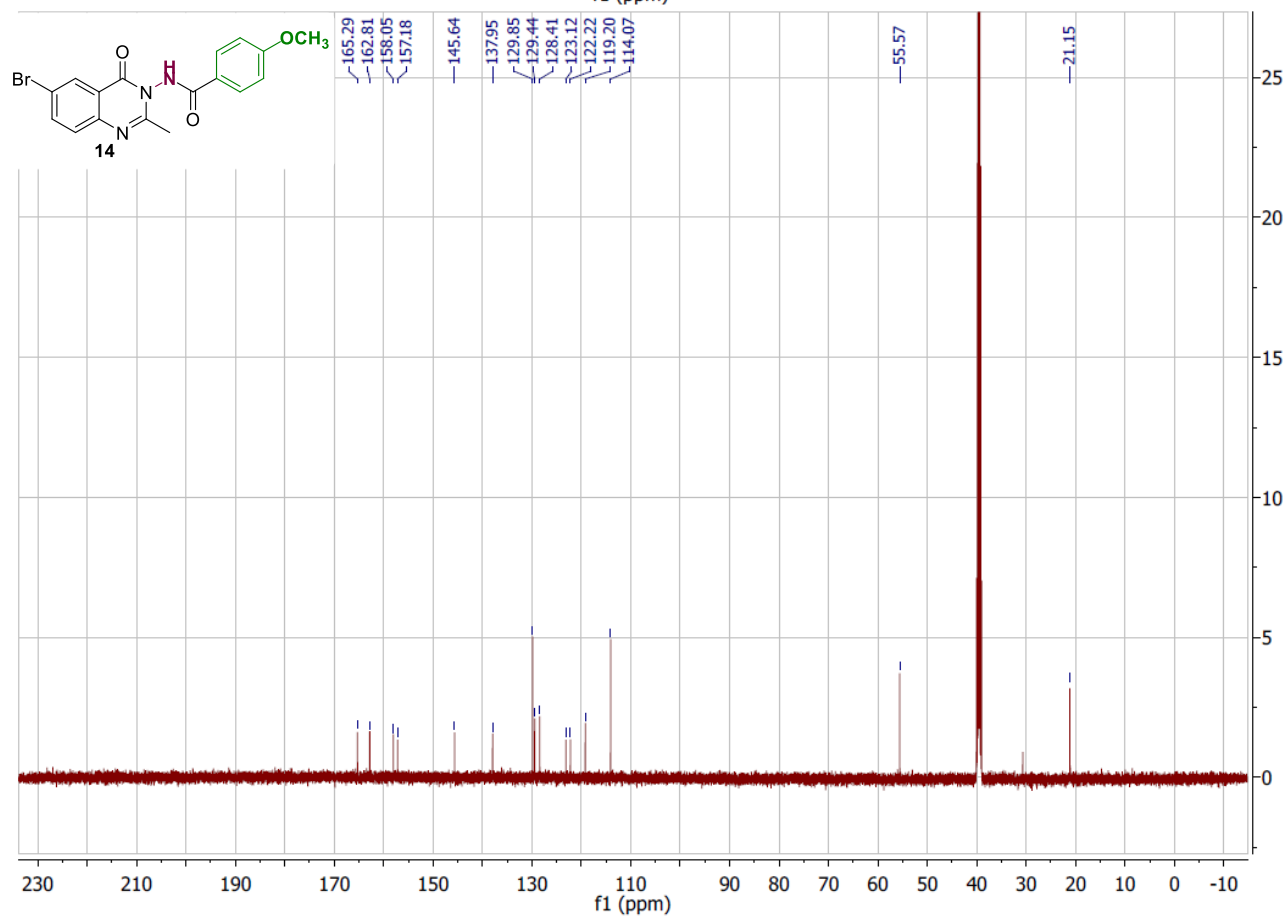

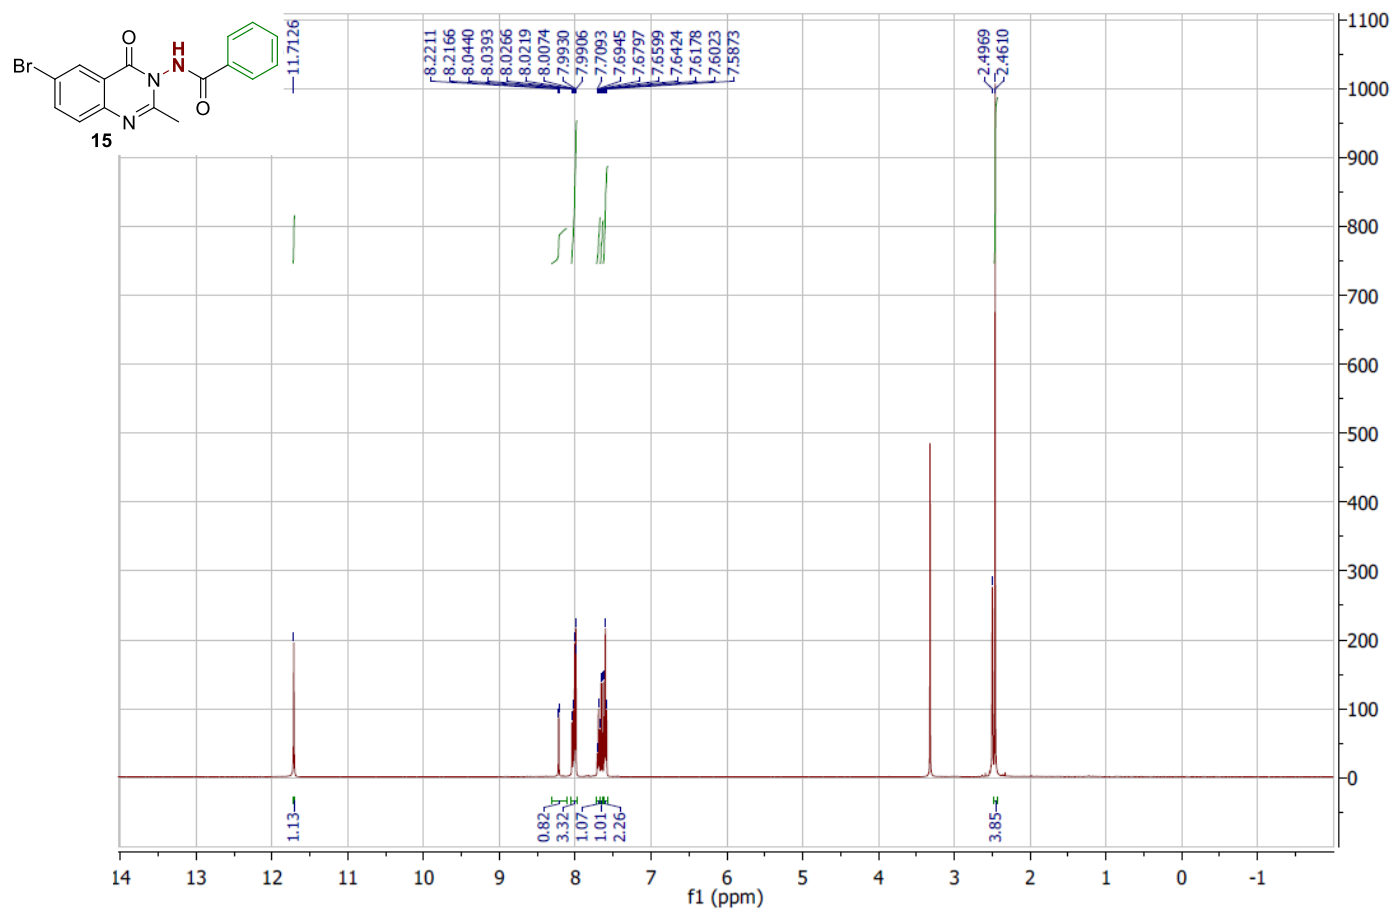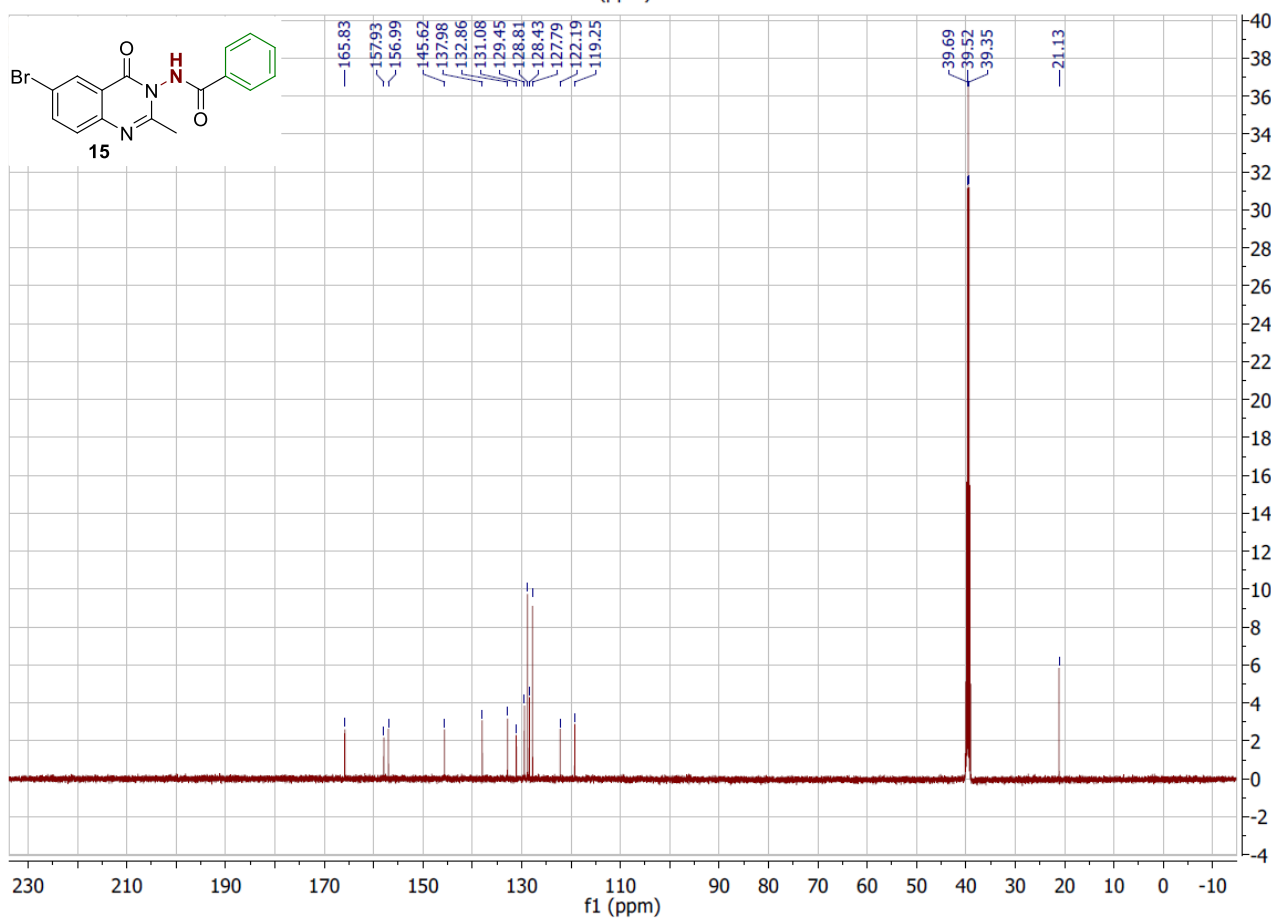

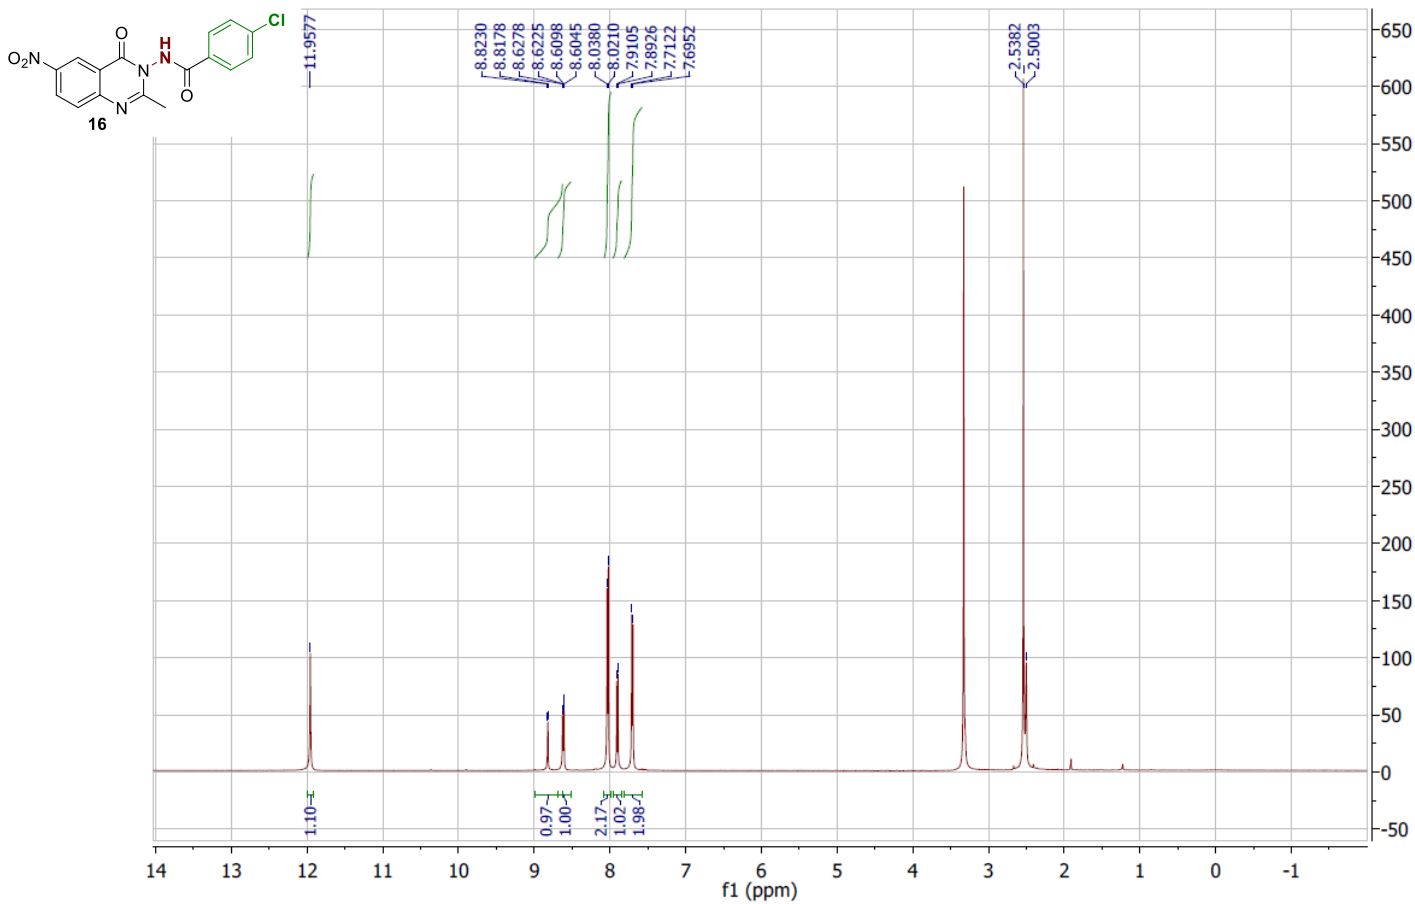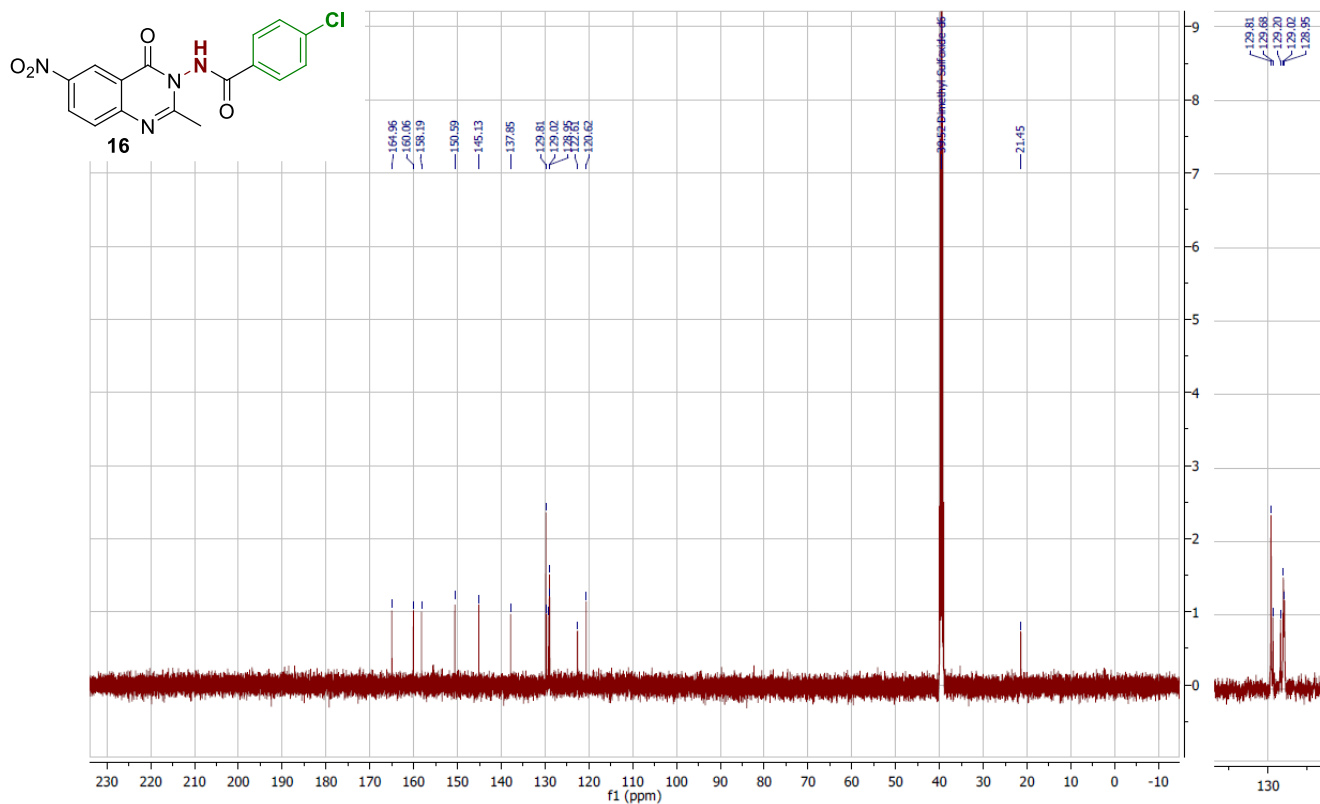

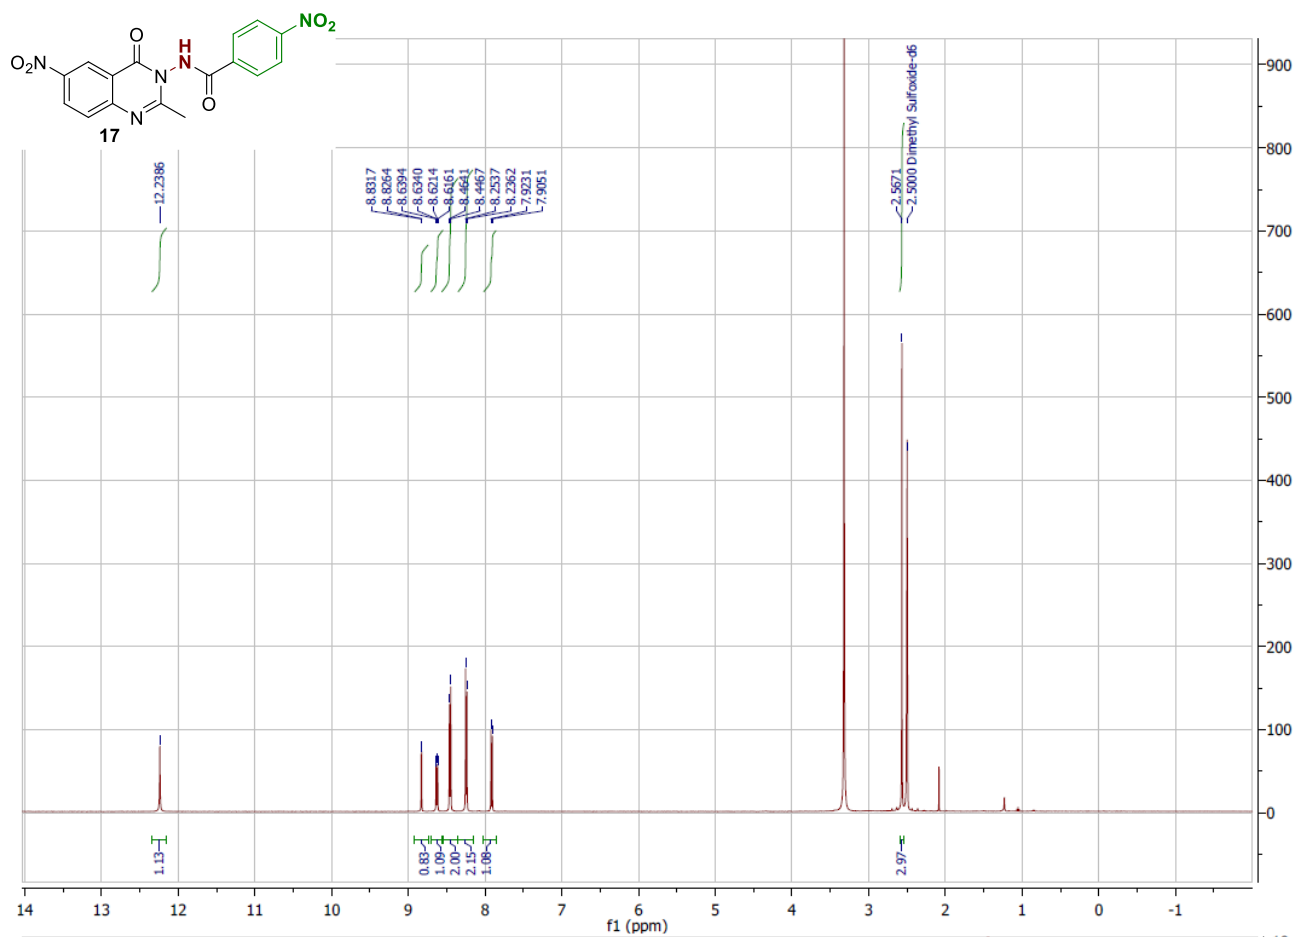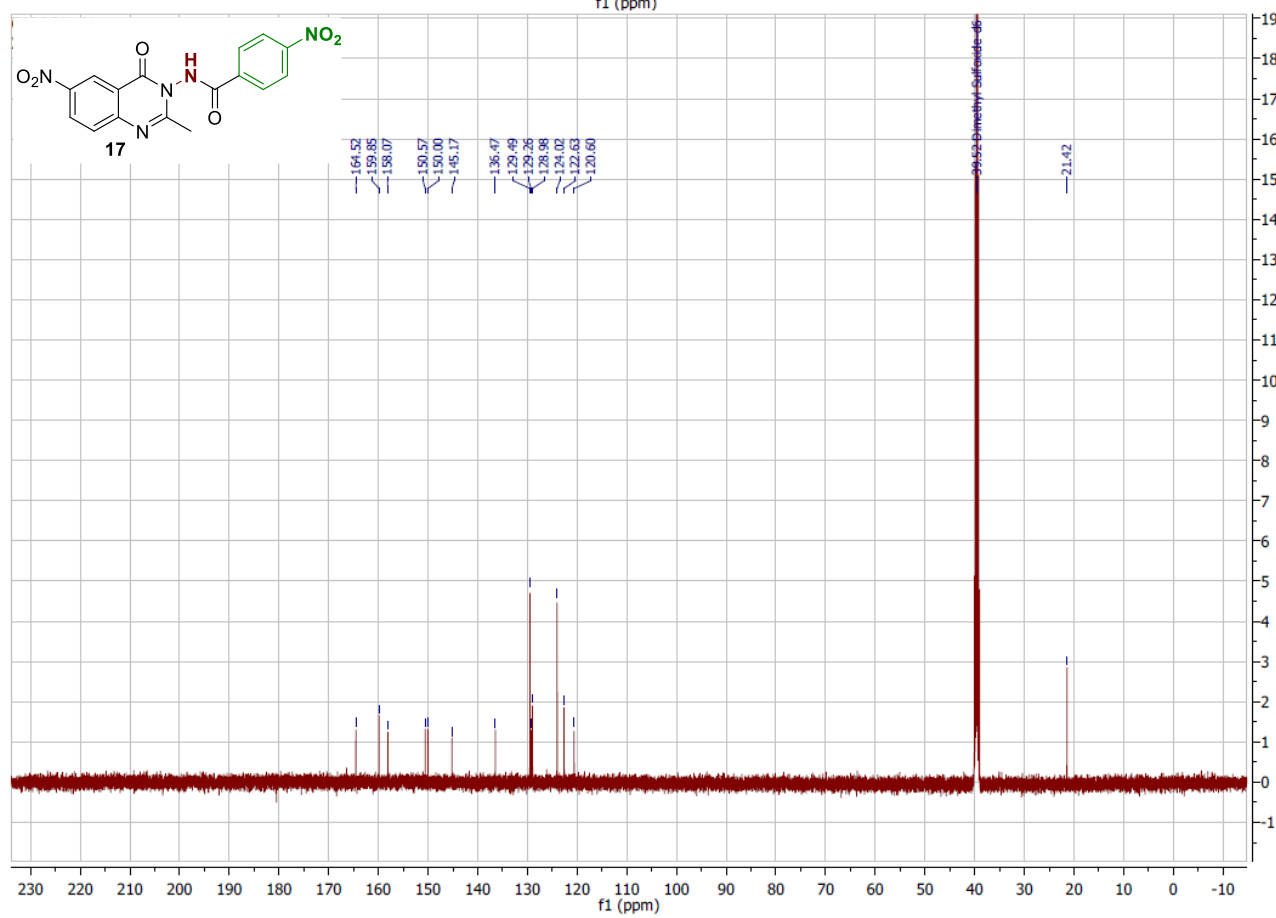

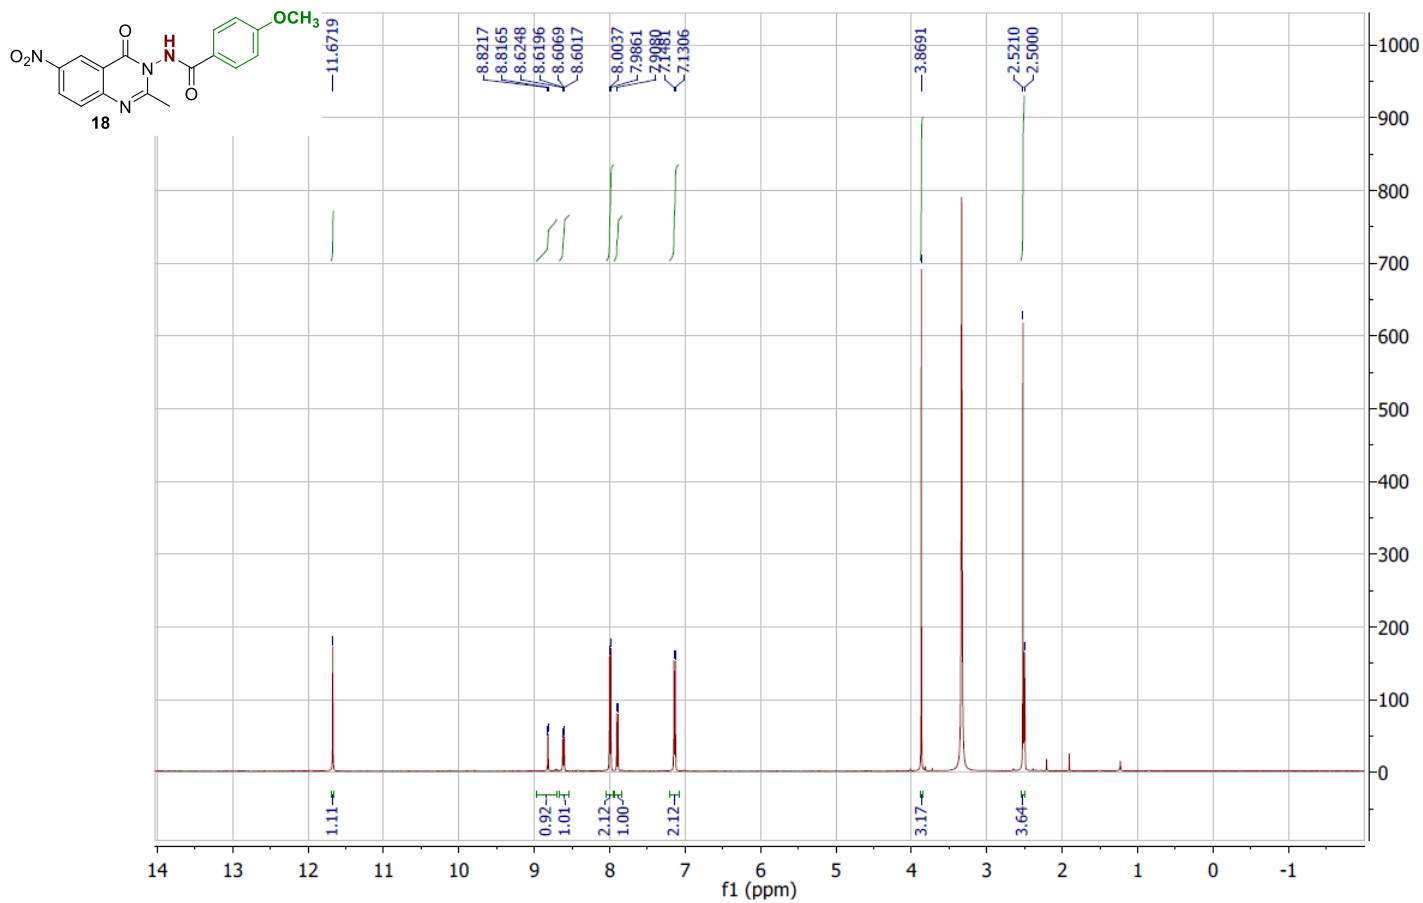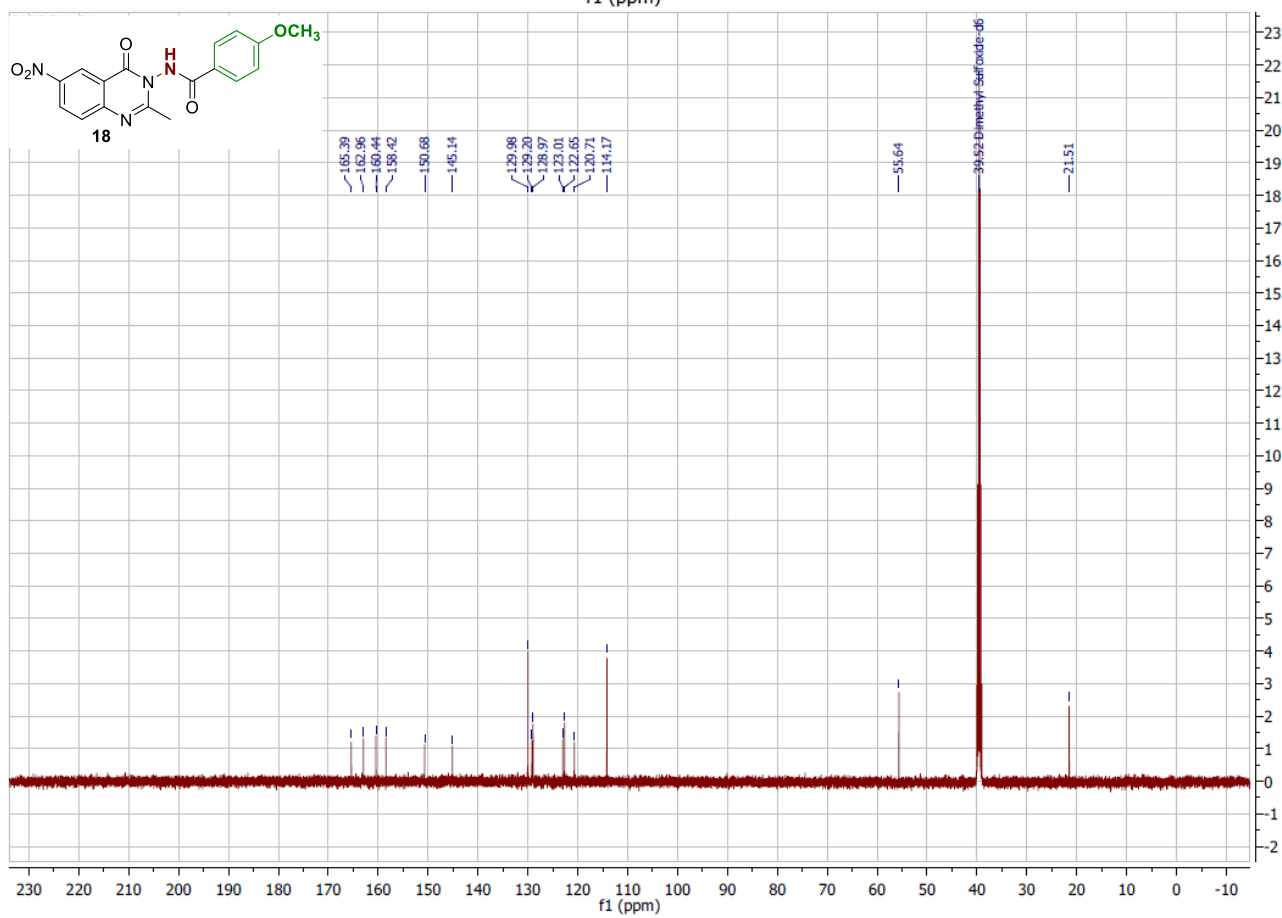

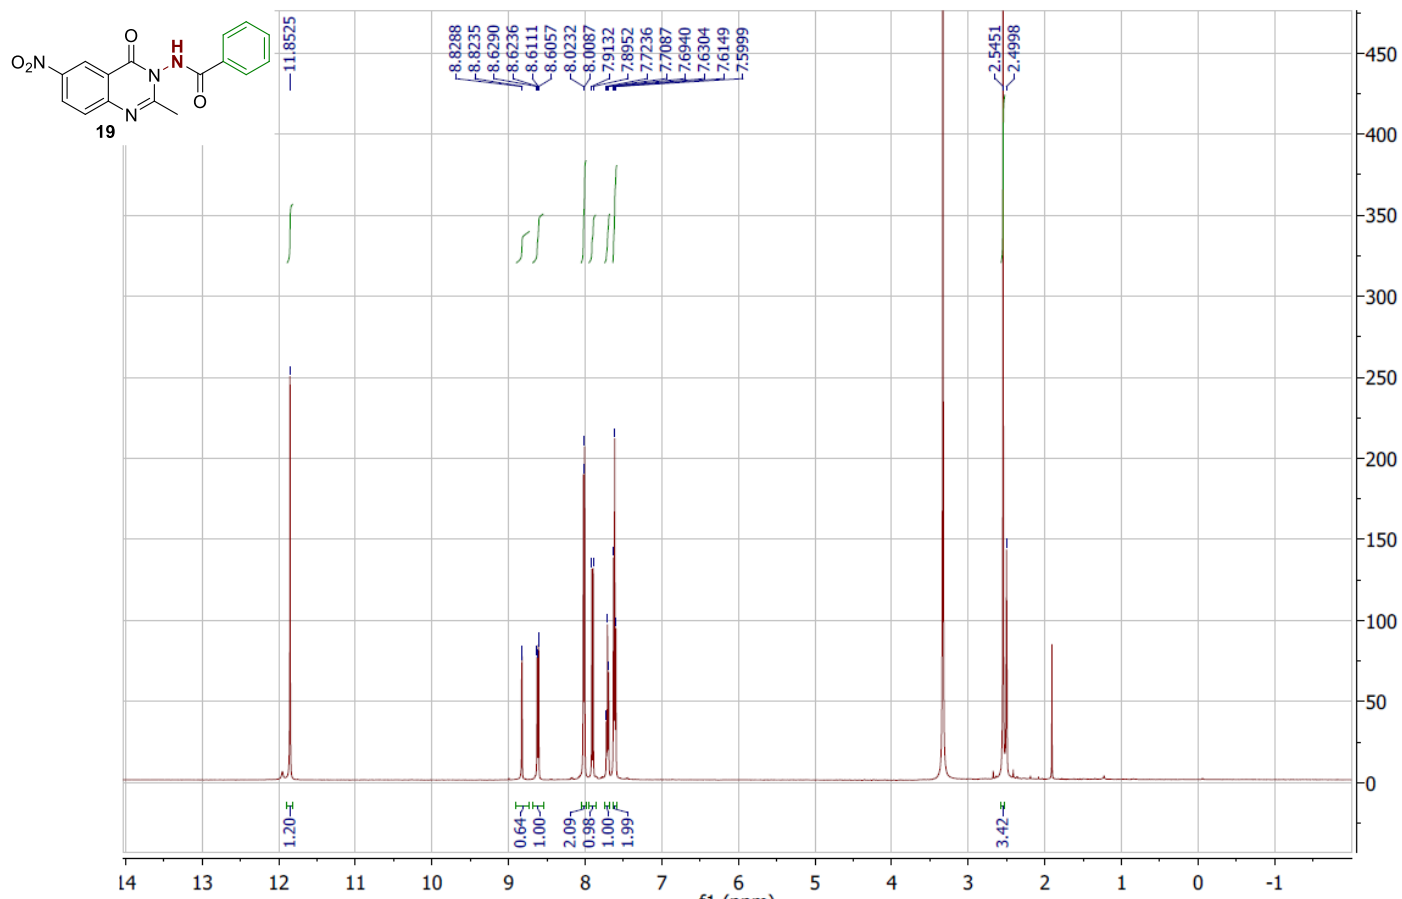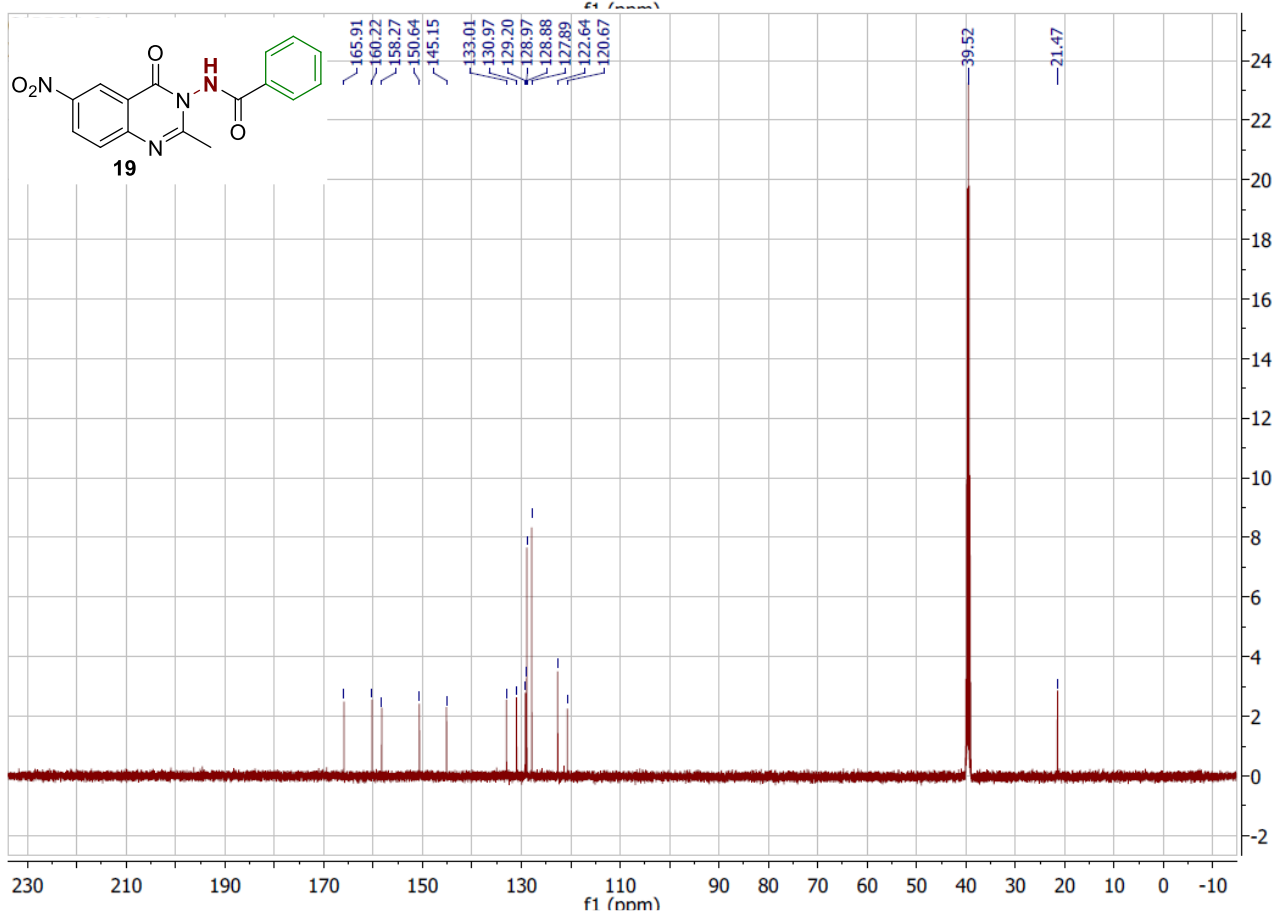

#### 4. Gel electrophoresis studies

##### A. 3-amino-2-methyl-6-nitroquinazolinone (**3j**) at various concentrations

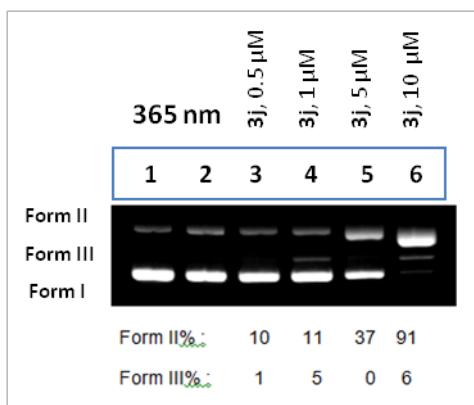

**Figure S1:** Comparative dose measurement results from DNA photo-cleavage by the quinazolinones derivative **3j** with UV light (365nm). Top: Gel electrophoresis picture; lane 1: DNA without UV irradiation; lane 2: DNA with UV irradiation; lanes 3–6: DNA + **3j** + UV irradiation as indicated at the top of the gel.

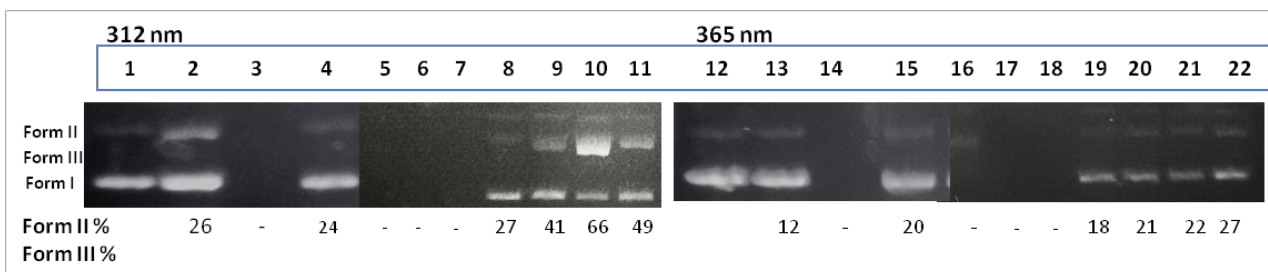

**Figure S2:** Gel electrophoresis picture of DNA photo-cleavage caused by quinazolinone arylamides at 500 μM. Lanes 1–11 at 312 nm; Lane 1: DNA with UV irradiation; lane 2: DNA + **9** + UV; lane 3: DNA + **10** + UV; lane 4: DNA + **11** + UV; lane 5: DNA + **16** + UV; lane 6: DNA + **17** + UV; lane 7: DNA + **19** + UV; lane 8: DNA + **12** + UV; lane 9: DNA + **13** + UV; lane 10: DNA + **14** + UV; lane 11: DNA + **15** + UV; Lanes 12–22 at 365 nm; Lane 12: DNA with UV irradiation; lane 13: DNA + **9** + UV; lane 14: DNA + **10** + UV; lane 15: DNA + **11** + UV; lane 16: DNA + **16** + UV; lane 17: DNA + **17** + UV; lane 18: DNA + **19** + UV; lane 19: DNA + **12** + UV; lane 20: DNA + **13** + UV; lane 21: DNA + **14** + UV; lane 22: DNA + **15** + UV.



## 5. Molecular Docking Images

(The numbers of compounds that appear within manuscript are given right before the picture).

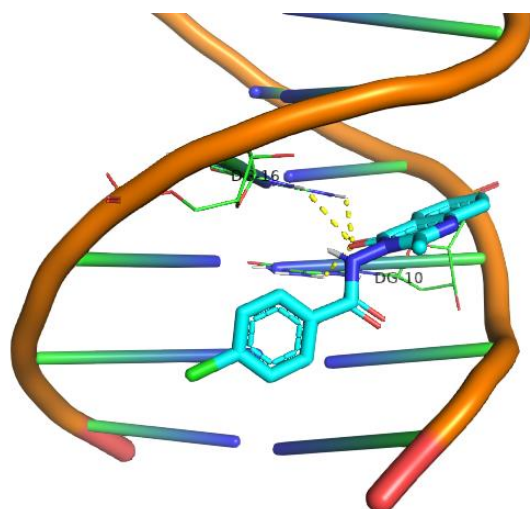

9

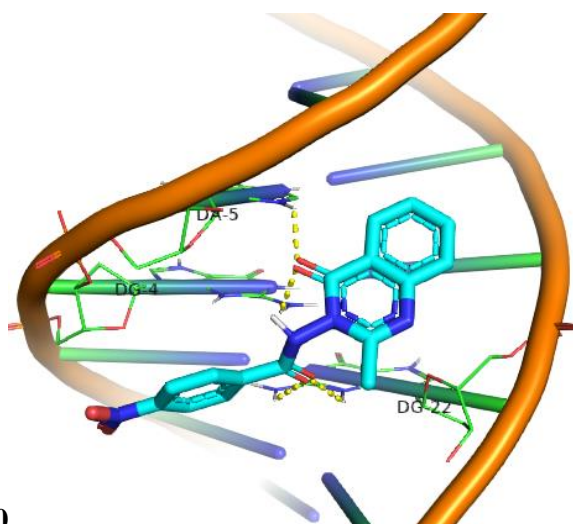

10

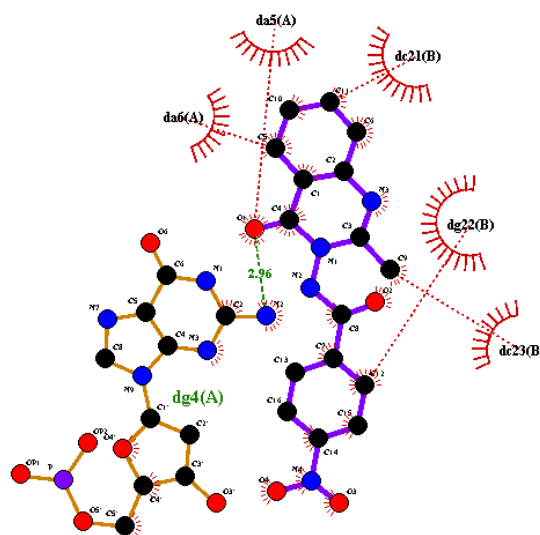

10

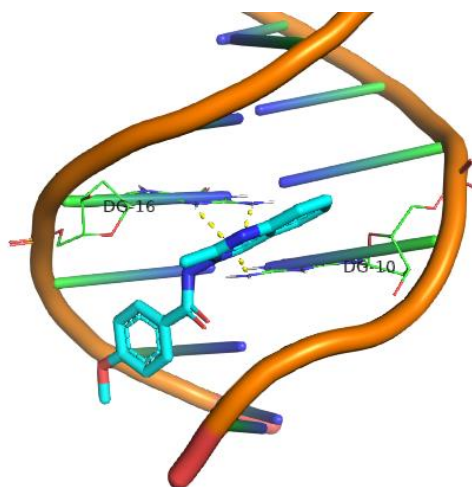

11

Ph-Ph QNZ arylamide

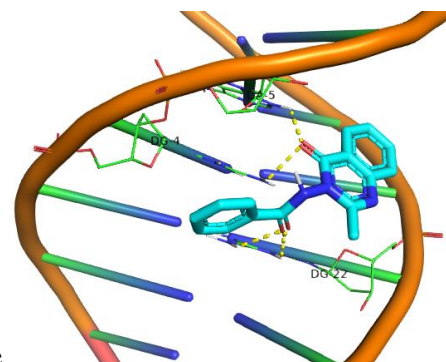

**Figure S3:** Molecular Docking representations for 6-H arylamides **9**, **10** (3D and 2D), **11** and 6-H-QNZ-3-NHCOAr-H.

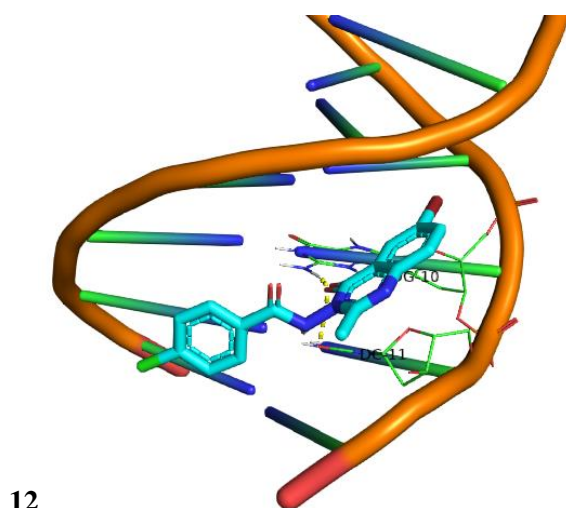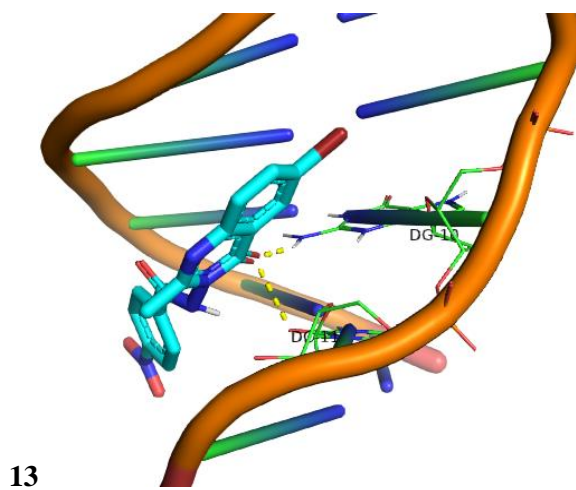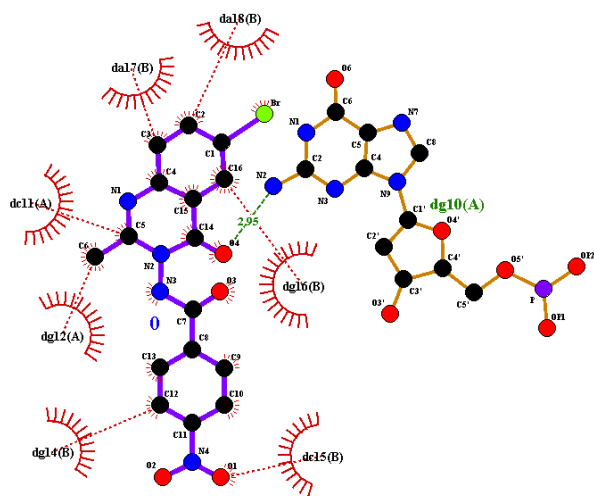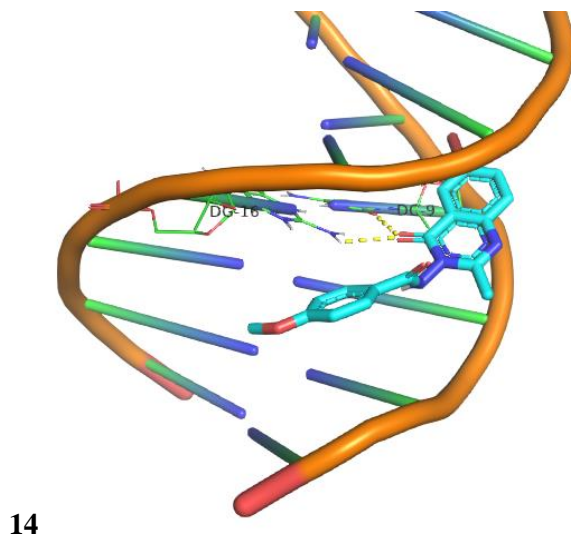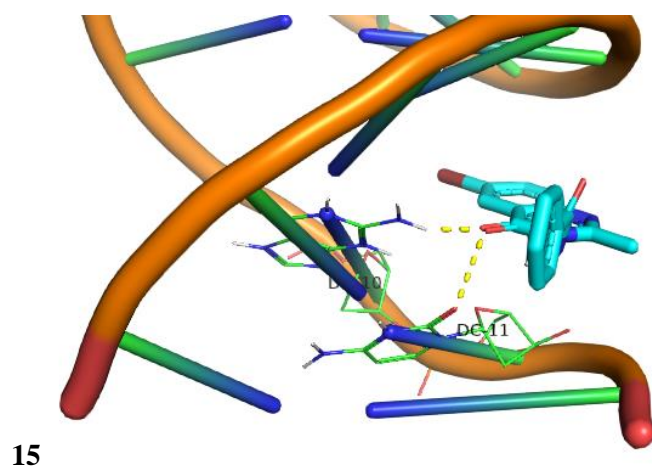

**Figure S4:** Molecular Docking representations for 6-Br arylamides **12**, **13** (3D and 2D), **14** and **15**.

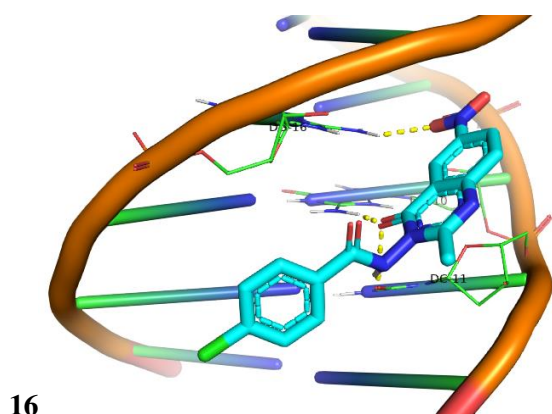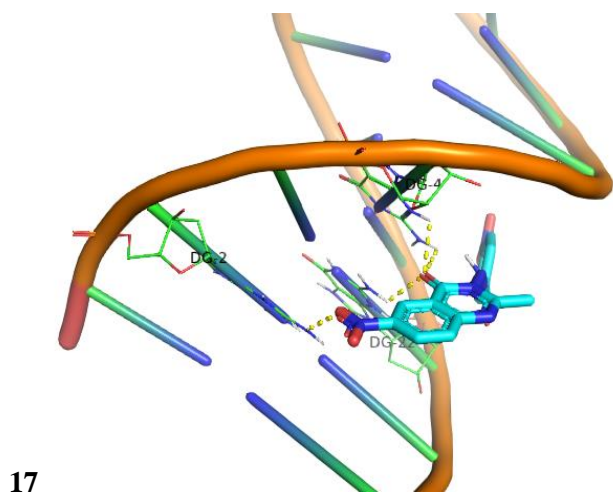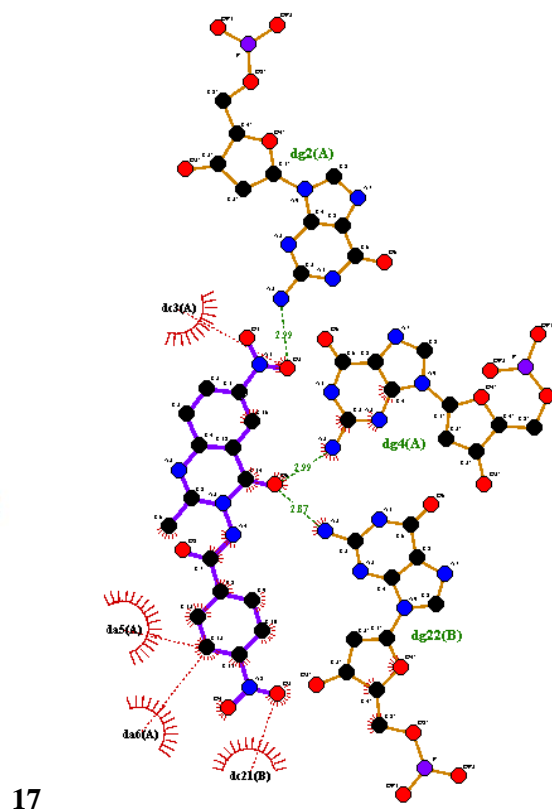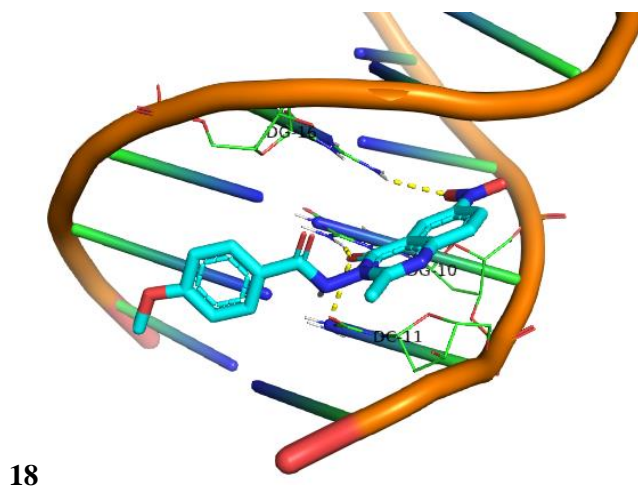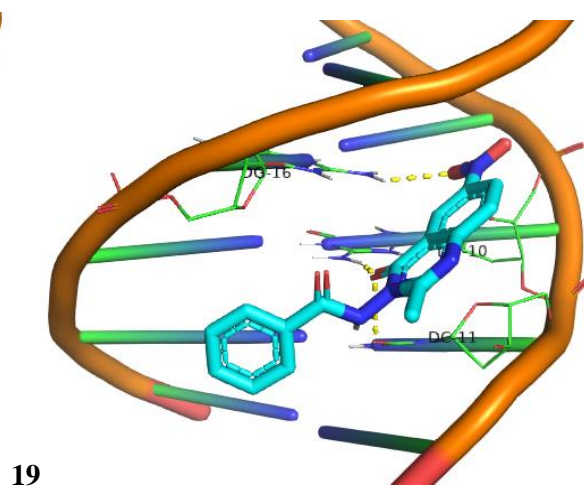

**Figure S5:** Molecular Docking representations for 6-NO<sub>2</sub> arylamides **16**, **17** (3D and 2D), **18** and **19**.
